# Supplementary material
Source: publisher figshare collection journal article supplement (https://gsapubs.figshare.com/ndownloader/files/36011627)
Supplement: Supplementary file 1 [file 36011627]

## Sheet: Supplementary Table S1
Supplementary Table S1. Zircon LA-ICP-MS U–Pb dating results of the volcanic rocks in SE Zhejiang Province
Spot No.	Th	U	Th/U	207Pb/206Pb		207Pb/235U		206Pb/238U		207Pb/235U		206Pb/238U
	(ppm)			Ratio	1σ	Ratio	1σ	Ratio	1σ	Age(Ma)	1σ	Age(Ma)	1σ
XX-1 (volcanic tuff from the Xiaoxiong Formation)
XX01-01	1594.28	943.774	1.68926	0.0493972	0.00234624	0.0992593	0.00458889	0.0145731	0.000208136	96.0924	4.23925	93.2661	1.32342
XX01-02	759.588	428.268	1.77363	0.047709	0.00285724	0.0968587	0.00571373	0.0147693	0.000245614	93.8725	5.2897	94.5128	1.56112
XX01-03	848.628	606.127	1.40008	0.0500736	0.00217495	0.10125	0.00430542	0.0147222	0.000276375	97.9294	3.97027	94.2133	1.75651
XX01-05	1730.45	565.586	3.05957	0.0494358	0.00248956	0.0986963	0.00489823	0.0146524	0.000251171	95.5722	4.52727	93.7704	1.59657
XX01-06	421.29	348.113	1.21021	0.050934	0.00427927	0.103825	0.00800745	0.0149368	0.000352603	100.301	7.36618	95.577	2.24017
XX01-08	2405.81	819.779	2.9347	0.0492064	0.00219929	0.0995355	0.00437846	0.014661	0.000158518	96.3475	4.04388	93.8245	1.00838
XX01-12	902.04	359.635	2.50821	0.0486775	0.00461137	0.0985308	0.00790146	0.0149198	0.000250771	95.4192	7.30368	95.4686	1.59364
XX01-19	1166.37	421.222	2.76902	0.047423	0.00314879	0.0966365	0.00614334	0.0147027	0.000241663	93.6669	5.68851	94.09	1.53613
XX01-20	2143.52	852.236	2.51517	0.0481891	0.00169478	0.099487	0.00349124	0.0149131	0.000154835	96.3027	3.22484	95.4263	0.984813
XX01-04	126.661	148.976	0.850211	0.050023	0.00311966	0.154096	0.00894227	0.0225469	0.000384245	145.522	7.8681	143.732	2.42363
XX01-10	713.341	551.292	1.29394	0.0485432	0.00267326	0.12013	0.0063263	0.0180804	0.000280116	115.19	5.73524	115.513	1.77477
XX01-15	92.3369	365.216	0.252828	0.0493161	0.00256791	0.132298	0.00681056	0.0197762	0.00035031	126.161	6.10794	126.241	2.2155
XX01-17	373.99	461.631	0.810149	0.0502774	0.00201805	0.144578	0.0059782	0.0207457	0.000260433	137.113	5.30423	132.367	1.64629
TS-1 (rhyolitic tuff from the Tangshang Formation)
TS01-01	674.606	420.876	1.60286	0.0493092	0.00330753	0.116199	0.00805801	0.0170367	0.000290088	111.62	7.3306	108.9	1.83964
TS01-02	309.134	263.246	1.17431	0.0532691	0.00286673	0.12211	0.00613246	0.016899	0.000236803	116.983	5.54976	108.028	1.5023
TS01-03	577.554	413.052	1.39826	0.0466725	0.00256339	0.109537	0.00608476	0.0171062	0.000273106	105.542	5.56888	109.341	1.73195
TS01-04	408.129	375.76	1.08614	0.0499187	0.00336189	0.116496	0.00800209	0.0170203	0.000333552	111.89	7.2778	108.797	2.11504
TS01-05	407.67	328.211	1.2421	0.0473193	0.00283511	0.109858	0.00622378	0.0170605	0.000255451	105.835	5.69445	109.051	1.62019
TS01-06	146.855	136.553	1.07544	0.0500225	0.00572981	0.114918	0.0112618	0.0173147	0.000523457	110.455	10.2567	110.662	3.31753
TS01-08	428.045	592.722	0.722169	0.0483217	0.0019482	0.113242	0.00443251	0.0170334	0.000217701	108.927	4.04355	108.88	1.38114
TS01-10	606.378	655.295	0.925352	0.0463675	0.00196452	0.109188	0.00476532	0.0170642	0.000280802	105.223	4.3629	109.075	1.78077
TS01-11	191.634	243.968	0.785489	0.0502229	0.00301708	0.117685	0.00627722	0.017107	0.000277095	112.971	5.70318	109.346	1.75722
TS01-13	207.732	290.463	0.715173	0.0487114	0.00292412	0.118665	0.00692829	0.0177121	0.000295153	113.861	6.2891	113.18	1.87056
TS01-15	279.543	302.668	0.923597	0.0546773	0.00342859	0.125316	0.00739513	0.0169108	0.00031952	119.88	6.67319	108.103	2.02634
TS01-16	211.209	286.642	0.736838	0.0534505	0.00363233	0.124349	0.00787367	0.0169679	0.000286915	119.008	7.11105	108.465	1.81965
TS01-17	202.604	240.88	0.8411	0.0495907	0.00355863	0.11549	0.00738471	0.0170509	0.000284568	110.975	6.72242	108.991	1.80465
TS01-18	185.893	276.316	0.672754	0.0489589	0.00388764	0.113945	0.00809647	0.0170828	0.000294871	109.567	7.38048	109.193	1.86986
TS01-19	272.002	352.973	0.770603	0.0511974	0.00348709	0.120266	0.00738092	0.0172017	0.000296203	115.313	6.69036	109.946	1.87809
TS01-20	546.7	583.641	0.936706	0.0490425	0.00202642	0.117817	0.00486841	0.0173594	0.000222526	113.091	4.42295	110.945	1.41129
TS01-07	208.466	327.64	0.636267	0.0482485	0.00242211	0.137737	0.00704127	0.0205756	0.000286462	131.026	6.28468	131.293	1.81081
TS01-09	105.902	100.636	1.05233	0.0525288	0.00920298	0.135729	0.0212862	0.0196039	0.000635278	129.232	19.0309	125.152	4.0171
TS01-12	230.355	184.899	1.24584	0.050783	0.00515084	0.136494	0.010925	0.0202875	0.00054285	129.917	9.76115	129.473	3.43056
TS01-14	113.062	101.826	1.11034	0.0500201	0.00494301	0.130767	0.0118308	0.0195787	0.000579521	124.787	10.6239	124.993	3.66472
CC-1 (lithic crystal tuff from the Chaochuan Formation)
CC01-02	386.984	206.566	1.87342	0.0524486	0.00404236	0.12323	0.00842559	0.0173971	0.000328411	117.996	7.61703	111.185	2.08174
CC01-04	1210.55	1264.67	0.957203	0.0489903	0.00171102	0.118448	0.00411548	0.0174763	0.000249255	113.664	3.73704	111.687	1.58035
CC01-11	885.87	940.009	0.942405	0.0484465	0.00260716	0.114109	0.0061654	0.0171632	0.000291342	109.717	5.61955	109.703	1.84737
CC01-14	1084.27	1088.61	0.99601	0.0482554	0.00184325	0.115138	0.00440814	0.0172845	0.000213085	110.655	4.01452	110.471	1.35161
CC01-15	951.061	951.679	0.999351	0.0500422	0.00220059	0.118403	0.005264	0.0172211	0.000285117	113.623	4.77974	110.069	1.80784
CC01-17	1096.33	1059.65	1.03462	0.0478176	0.00172441	0.114666	0.00413095	0.0173659	0.000184498	110.224	3.76375	110.987	1.17059
CC01-20	1695.29	1336.77	1.2682	0.049284	0.00192913	0.119451	0.00442732	0.0176235	0.000245162	114.574	4.0165	112.619	1.55424
CC01-03	278.763	264.396	1.05434	0.0488153	0.00385806	0.140871	0.0111481	0.0209276	0.000412344	133.82	9.92228	133.515	2.60465
CC01-12	194.53	251.182	0.774459	0.0493877	0.00386099	0.145705	0.0104222	0.0216	0.000393497	138.112	9.2372	137.76	2.48413
CC01-16	389.038	354.16	1.09848	0.0490789	0.00259572	0.140483	0.00731279	0.0207968	0.000280261	133.474	6.51127	132.69	1.77132
CC01-18	699.393	550.782	1.26982	0.049118	0.00186922	0.166532	0.0063417	0.0245438	0.000238439	156.405	5.52102	156.309	1.50263
GT-01 (rhyolitic tuff from the Guantou Formation)
GT01-02	170.673	141.481	1.20633	0.0484386	0.00628684	0.120879	0.014419	0.0185574	0.000641696	115.869	13.0621	118.532	4.06178
GT01-03	364.737	133.782	2.72636	0.0505218	0.00636155	0.125711	0.0143023	0.0188377	0.000726162	120.237	12.9008	120.306	4.59505
GT01-04	169.28	133.522	1.2678	0.0476003	0.00504688	0.121359	0.0111779	0.0184233	0.0006222	116.303	10.1218	117.683	3.93892
GT01-05	389.914	153.843	2.5345	0.051628	0.00646275	0.129245	0.0149622	0.0182987	0.000607358	123.419	13.4538	116.894	3.84544
GT01-07	329.932	131.874	2.50187	0.05103	0.00557983	0.122388	0.0122444	0.0182674	0.000612983	117.235	11.0773	116.696	3.88116
GT01-08	614.425	312.218	1.96793	0.047953	0.00478203	0.119776	0.0119419	0.0179916	0.000648667	114.869	10.8289	114.951	4.10814
GT01-09	79.5417	108.413	0.733691	0.0528039	0.0079086	0.128587	0.018483	0.018163	0.000729929	122.827	16.6293	116.035	4.62191
GT01-11	118.91	135.76	0.875885	0.04795	0.0039056	0.119733	0.00860103	0.0184006	0.000336257	114.83	7.79987	117.54	2.12943
GT01-12	324.664	304.102	1.06761	0.0508972	0.0028526	0.12681	0.00722399	0.0180561	0.000273058	121.227	6.51015	115.359	1.73015
GT01-13	407.209	355.318	1.14604	0.0492737	0.00249914	0.122503	0.00604197	0.0180794	0.000242047	117.339	5.46597	115.506	1.53389
GT01-15	52.4744	67.6746	0.775393	0.0505858	0.00746333	0.119345	0.013744	0.0181939	0.0006724	114.478	12.4677	116.231	4.25758
GT01-16	56.7693	77.007	0.737197	0.0506934	0.00711306	0.118859	0.0143003	0.0181304	0.000487798	114.037	12.978	115.829	3.08918
GT01-17	80.5719	81.715	0.986011	0.0526637	0.00691821	0.125998	0.0163729	0.0181763	0.000543644	120.495	14.7647	116.12	3.44256
GT01-18	136.197	89.5606	1.52072	0.0508009	0.00498095	0.122215	0.00920711	0.0180057	0.000377302	117.078	8.331	115.04	2.39003
GT01-19	365.201	316.635	1.15338	0.0489226	0.00310644	0.120538	0.00730415	0.0181006	0.00025505	115.56	6.61917	115.64	1.61613
GT01-20	277.524	133.524	2.07846	0.0521273	0.00610843	0.125657	0.0141351	0.0180803	0.000527639	120.188	12.7506	115.512	3.34155
GT01-06	130.858	165.59	0.790254	0.0466762	0.00447072	0.144409	0.0132641	0.0230143	0.000714262	136.963	11.769	146.679	4.50154
JLP-01 (rhyolite from the Jiuliping Formation)
JLP01-01	921.178	955.635	0.963943	0.0482263	0.00144148	0.12387	0.00379772	0.0186197	0.000193575	118.575	3.43207	118.926	1.22673
JLP01-03	331.497	251.02	1.3206	0.0494769	0.00416553	0.123703	0.00898095	0.018587	0.000380518	118.424	8.11563	118.72	2.40907
JLP01-08	615.949	450.102	1.36846	0.049048	0.00284238	0.124836	0.00694522	0.0186715	0.000400783	119.447	6.26994	119.254	2.53707
JLP01-10	1376.81	784.4	1.75524	0.050788	0.00205897	0.130995	0.00528242	0.0187315	0.000262134	124.991	4.74321	119.634	1.66001
JLP01-12	494.59	368.378	1.34262	0.0476477	0.00347253	0.12531	0.00924778	0.0189612	0.000316843	119.875	8.3448	121.087	2.00556
JLP01-16	885.776	864.812	1.02424	0.0517363	0.00197721	0.130481	0.00480549	0.0183085	0.000271	124.53	4.31706	116.957	1.71673
JLP01-18	295.319	249.585	1.18324	0.0500892	0.00441916	0.129606	0.0104612	0.0188619	0.000498515	123.743	9.40377	120.459	3.15481
JLP01-19	1138.49	917.416	1.24098	0.0535479	0.00290933	0.139137	0.0075655	0.0188429	0.000265131	132.275	6.7442	120.339	1.67879
JLP01-20	802.595	931.166	0.861925	0.0528495	0.00192696	0.135276	0.00464622	0.0186915	0.00023826	128.827	4.15647	119.381	1.50912
JLP01-02	144.188	145.113	0.993623	0.0495494	0.0059716	0.150765	0.0189615	0.0220272	0.00049085	142.587	16.731	140.455	3.09695
JLP01-04	737.949	647.955	1.13889	0.0490518	0.00259864	0.136997	0.00685595	0.0204153	0.000246502	130.365	6.12328	130.28	1.55885
JLP01-05	872.639	757.956	1.15131	0.0489929	0.00205428	0.136641	0.00566803	0.0203371	0.000305624	130.047	5.06414	129.786	1.93218
JLP01-06	511.796	551.032	0.928795	0.0532258	0.00242889	0.160885	0.00734136	0.0219549	0.000304408	151.478	6.42204	139.999	1.92167
JLP01-07	367.292	307.796	1.1933	0.0494356	0.00299696	0.15292	0.0096201	0.0227021	0.000687052	144.487	8.47304	144.711	4.33141
JLP01-09	319.753	337.561	0.947245	0.0506983	0.00219896	0.220188	0.00975279	0.0315325	0.000445076	202.066	8.11698	200.133	2.78353
JLP01-13	713.606	454.137	1.57134	0.0493017	0.00208333	0.142557	0.00580979	0.021169	0.000275394	135.319	5.16394	135.04	1.74003
JLP01-15	801.772	990.16	0.80974	0.0487612	0.00190898	0.134425	0.00546764	0.0199103	0.000217999	128.066	4.89466	127.089	1.37958
CW-01 (sedimentary tuff from the Chawan Formation)
CW01-01	880.403	699.01	1.2595	0.050057	0.00250084	0.124723	0.00622978	0.0181146	0.000275248	119.345	5.62474	115.729	1.74391
CW01-02	108.218	130.304	0.830502	0.0484329	0.00514149	0.132667	0.0132612	0.0197616	0.00054949	126.492	11.8884	126.149	3.47426
CW01-03	273.244	227.874	1.1991	0.0482037	0.00373072	0.130014	0.00942896	0.0199601	0.000401807	124.11	8.47289	127.404	2.54046
CW01-04	295.012	305.226	0.966537	0.0479211	0.00258147	0.129709	0.00658977	0.0197803	0.000271044	123.836	5.92349	126.267	1.71473
CW01-05	124.068	132.862	0.933814	0.0561906	0.0050964	0.151631	0.0132574	0.0195568	0.000533789	143.351	11.6894	124.854	3.37569
CW01-06	245.964	251.857	0.9766	0.0494839	0.00405764	0.13214	0.00955472	0.0195136	0.000399059	126.019	8.56978	124.581	2.52416
CW01-08	99.2886	141.084	0.703757	0.0526497	0.00690587	0.132872	0.0144417	0.0191876	0.000485018	126.675	12.9442	122.519	3.06847
CW01-09	203.568	145.561	1.39851	0.0544178	0.0052175	0.140743	0.0115744	0.0191748	0.000410492	133.705	10.3029	122.438	2.59726
CW01-10	309.354	233.401	1.32542	0.0519006	0.00506125	0.136339	0.0126362	0.0197016	0.000493597	129.778	11.2915	125.77	3.12119
CW01-11	113.177	117.485	0.96333	0.0560064	0.00654298	0.137851	0.0139905	0.0181692	0.000452622	131.128	12.4851	116.075	2.86641
CW01-13	490.456	393.57	1.24617	0.0556968	0.00253419	0.149462	0.0067636	0.0196575	0.000234576	141.437	5.97543	125.491	1.48457
CW01-14	599.669	444.492	1.34911	0.0486484	0.00374865	0.131213	0.00974361	0.0196684	0.000256359	125.187	8.74633	125.56	1.62214
CW01-15	180.497	193.836	0.931186	0.0491536	0.00324264	0.131891	0.00793881	0.0196994	0.000329571	125.796	7.12217	125.756	2.08461
CW01-16	276.066	283.315	0.974416	0.0505135	0.00297853	0.13474	0.00781121	0.0196489	0.00030285	128.348	6.99014	125.436	1.91588
CW01-18	313.452	375.277	0.835255	0.049829	0.00300149	0.131783	0.00741327	0.0196064	0.000304861	125.699	6.65139	125.168	1.92865
CW01-19	524.378	386.5	1.35673	0.0489656	0.0023399	0.131049	0.00593381	0.0196219	0.000247933	125.039	5.32767	125.266	1.56898
CW01-17	281.097	291.323	0.964898	0.0499762	0.00442784	0.162199	0.0131565	0.0240862	0.000459801	152.626	11.495	153.429	2.89554
XST-03 (lithic crystal tuff from the upper Xishantou Formation)
XST03-04	111.936	98.5294	1.13606	0.0501514	0.0050771	0.133209	0.0110962	0.0204198	0.000459279	126.977	9.94283	130.309	2.90231
XST03-06	85.1367	104.113	0.817736	0.053367	0.00470952	0.140129	0.00928749	0.0202848	0.000421769	133.159	8.2718	129.455	2.66576
XST03-07	255.115	197.07	1.29454	0.0495692	0.00342655	0.136269	0.00865951	0.0202908	0.000379862	129.715	7.73874	129.494	2.40107
XST03-08	412.84	276.848	1.49122	0.0481871	0.00271054	0.131073	0.00694214	0.0200124	0.000336437	125.062	6.23265	127.735	2.12738
XST03-13	113.883	96.6071	1.17883	0.0517463	0.00515372	0.14412	0.012287	0.02045	0.000472497	136.707	10.9048	130.499	2.9857
XST03-14	177.729	109.763	1.61921	0.0522112	0.00568373	0.141052	0.0122476	0.020432	0.000455321	133.981	10.8991	130.386	2.87728
XST03-15	152.965	181.052	0.844865	0.0518943	0.00415877	0.14614	0.0108702	0.020685	0.000362921	138.498	9.63057	131.983	2.29324
XST03-16	420.868	577.026	0.729375	0.048555	0.00179945	0.136005	0.00494547	0.0202591	0.000194085	129.479	4.42124	129.293	1.22829
XST03-17	250.361	268.782	0.931463	0.0485841	0.00237529	0.136785	0.006459	0.0204183	0.000255153	130.177	5.76989	130.299	1.61345
XST03-18	418.422	400.265	1.04536	0.0447299	0.00268683	0.125109	0.00683744	0.0204753	0.000320061	119.694	6.17116	130.659	2.02308
XST03-19	1216.09	307.128	3.95955	0.0495224	0.00307153	0.138143	0.00788624	0.0204397	0.000296771	131.388	7.0362	130.434	1.87611
XST03-20	166.763	90.8504	1.83557	0.0506627	0.00484268	0.135356	0.010814	0.0201439	0.000446365	128.899	9.67169	128.566	2.82149
XST-02 (ignimbrite from the middle Xishantou Formation)
XST02-01	269.011	220.013	1.2227	0.0494289	0.00294256	0.137107	0.00741414	0.0203913	0.000286697	130.464	6.62107	130.128	1.8126
XST02-02	349.093	272.136	1.28279	0.0492882	0.00350314	0.140139	0.0100202	0.0205622	0.000331189	133.168	8.9242	131.208	2.09317
XST02-04	214.024	222.859	0.960355	0.0516857	0.00369406	0.141344	0.00874845	0.0205208	0.000433628	134.24	7.78349	130.947	2.74005
XST02-05	136.396	180.134	0.757189	0.0546445	0.00404435	0.151024	0.0107892	0.0205467	0.000451986	142.816	9.51829	131.11	2.8559
XST02-06	121.204	118.13	1.02602	0.0471651	0.00629923	0.128029	0.0146254	0.0205448	0.00055229	122.325	13.1651	131.098	3.48934
XST02-07	143.52	123.582	1.16133	0.0520549	0.00522748	0.144922	0.0129559	0.0205299	0.000493662	137.419	11.4904	131.004	3.11914
XST02-08	127.131	166.025	0.765731	0.0539901	0.004875	0.153762	0.0120293	0.0207088	0.000418107	145.228	10.587	132.134	2.64157
XST02-09	231.621	289.014	0.801416	0.0524008	0.00348949	0.144944	0.00894768	0.020498	0.000381939	137.438	7.93572	130.803	2.41372
XST02-10	216.277	234.558	0.922062	0.049732	0.00456377	0.137648	0.0115004	0.020475	0.000400428	130.946	10.2648	130.657	2.53052
XST02-11	122.466	104.599	1.17081	0.0480502	0.0061811	0.12919	0.0157268	0.0205832	0.000806345	123.369	14.142	131.341	5.09369
XST02-12	110.883	162.775	0.681204	0.0516723	0.00713043	0.138613	0.0160776	0.0206513	0.000594189	131.807	14.3379	131.771	3.75356
XST02-13	206.868	214.183	0.965847	0.0472683	0.00408688	0.131676	0.0101477	0.0205744	0.000437179	125.602	9.10527	131.285	2.76233
XST02-14	281.664	235.636	1.19534	0.051125	0.00355176	0.143174	0.00958845	0.0204715	0.000374961	135.867	8.5171	130.635	2.36971
XST02-15	306.313	404.556	0.757159	0.0489387	0.0028209	0.137292	0.00752551	0.0204891	0.000370316	130.629	6.71942	130.747	2.34035
XST02-17	175.412	153.594	1.14205	0.0498975	0.00359613	0.137797	0.00885203	0.0205088	0.000345098	131.08	7.90015	130.871	2.18108
XST02-18	240.075	382.598	0.627485	0.0491913	0.00257492	0.137384	0.00676969	0.0204678	0.000319052	130.711	6.0442	130.612	2.01672
XST02-19	150.262	216.526	0.693966	0.0462295	0.00404982	0.127146	0.00946134	0.0204977	0.000397577	121.53	8.52359	130.801	2.51246
XST02-20	150.239	129.181	1.16301	0.0531519	0.00415339	0.148617	0.0112051	0.0203551	0.000443782	140.69	9.90583	129.9	2.80461
XST02-03	216.129	223.478	0.967117	0.0498115	0.00427218	0.162791	0.0136606	0.0239199	0.000573369	153.143	11.9292	152.382	3.61077
XST-01 (ignimbrite from the lower Xishantou Formation)
XST01-01	222.882	220.061	1.01282	0.044464	0.00423402	0.130835	0.0119806	0.0206157	0.000485619	124.848	10.7578	131.546	3.06809
XST01-02	293.853	282.692	1.03948	0.0482863	0.00300115	0.136787	0.00811371	0.020441	0.000321498	130.178	7.24774	130.442	2.03221
XST01-03	254.897	249.408	1.02201	0.0487346	0.00308408	0.13654	0.00809958	0.020675	0.00033454	129.958	7.23669	131.921	2.1141
XST01-04	207.332	349.726	0.592841	0.0487143	0.00342468	0.137118	0.00962641	0.0203864	0.000387564	130.474	8.5963	130.098	2.44949
XST01-05	288.735	264.587	1.09127	0.0536477	0.00482833	0.15056	0.011874	0.0206186	0.000451144	142.406	10.4794	131.564	2.85039
XST01-06	343.08	274.117	1.25158	0.0496598	0.00394778	0.140846	0.00994509	0.0209904	0.000352628	133.797	8.85186	133.912	2.22763
XST01-07	184.527	172.599	1.06911	0.0487524	0.00537599	0.137605	0.0135263	0.0205276	0.000415	130.908	12.0734	130.99	2.62241
XST01-08	285.724	317.707	0.899331	0.0527601	0.00306943	0.1479	0.00805033	0.0204855	0.000321204	140.056	7.12162	130.724	2.03027
XST01-09	127.859	151.223	0.845498	0.0457768	0.00488939	0.124993	0.0121731	0.0206421	0.000514014	119.589	10.9874	131.713	3.24731
XST01-10	155.34	272.457	0.570144	0.0524952	0.00441999	0.148241	0.0122795	0.0204711	0.000365005	140.357	10.8591	130.632	2.30685
XST01-11	246.974	228.951	1.07872	0.0490867	0.00385662	0.135805	0.0103201	0.0203265	0.000385678	129.301	9.22639	129.719	2.43772
XST01-14	119.024	150.301	0.791903	0.0491018	0.00417267	0.13735	0.0113851	0.0204066	0.000504366	130.681	10.1646	130.225	3.18711
XST01-15	127.325	172.826	0.736719	0.0479349	0.00445477	0.134726	0.0123267	0.0201844	0.000453488	128.336	11.0306	128.821	2.86638
XST01-16	109.107	137.42	0.79397	0.0505851	0.0060642	0.142029	0.014853	0.0210905	0.000490943	134.849	13.2061	134.544	3.10031
XST01-17	163.208	211.083	0.773193	0.0457849	0.00575809	0.130458	0.0158742	0.0205809	0.000413087	124.509	14.2585	131.326	2.61019
XST01-18	279.422	261.269	1.06948	0.0498831	0.00431095	0.138145	0.0108276	0.0203449	0.000326306	131.391	9.66016	129.835	2.06275
XST01-19	288.902	302.349	0.955525	0.0525731	0.00345499	0.148435	0.00941372	0.0203682	0.00041467	140.53	8.32364	129.982	2.62071
XST01-13	94.6812	83.5215	1.13361	0.0515602	0.00645317	0.175104	0.0196705	0.0243032	0.000633804	163.839	16.9972	154.795	3.9897
GW-03 (crystal tuff from the upper Gaowu Formation)
GW03-01	203.254	235.567	0.862829	0.0492638	0.00334702	0.136086	0.00862362	0.020409	0.000366958	129.552	7.70791	130.24	2.31932
GW03-02	96.988	183.901	0.527392	0.0500573	0.00399247	0.139459	0.0100223	0.0205914	0.000442489	132.562	8.93142	131.392	2.79581
GW03-03	354.218	344.485	1.02825	0.051124	0.00383855	0.143084	0.0105861	0.0205709	0.000392926	135.787	9.40394	131.263	2.48292
GW03-04	178.739	223.04	0.801375	0.0489029	0.00326966	0.139759	0.0088773	0.0208073	0.000341316	132.829	7.90908	132.756	2.15661
GW03-06	262.476	193.391	1.35723	0.0489468	0.00331802	0.137252	0.00914788	0.0205122	0.00035747	130.594	8.16807	130.893	2.25919
GW03-08	241.52	195.538	1.23515	0.0495466	0.00375893	0.138446	0.00936802	0.0206103	0.000356034	131.659	8.35584	131.512	2.24992
GW03-09	226.607	268.019	0.845487	0.0469995	0.00316686	0.134355	0.00892048	0.0207513	0.000276912	128.004	7.98537	132.402	1.75026
GW03-11	406.019	343.149	1.18321	0.0481761	0.00238743	0.139569	0.00722735	0.0208956	0.000332422	132.66	6.44037	133.313	2.10031
GW03-13	168.194	217.509	0.773273	0.0493451	0.00412184	0.138879	0.0100572	0.0207238	0.000350241	132.045	8.96707	132.228	2.21311
GW03-14	480.64	588.215	0.817116	0.0489463	0.00224982	0.139943	0.00619267	0.0208484	0.000295302	132.993	5.51675	133.016	1.86614
GW03-16	409.106	672.742	0.608117	0.0500235	0.00234455	0.146403	0.0070384	0.0211326	0.000307854	138.731	6.23471	134.81	1.94485
GW03-17	117.948	135.276	0.871905	0.0523124	0.00776496	0.145905	0.0212514	0.0204088	0.000458702	138.29	18.831	130.239	2.8987
GW03-19	287.357	209.701	1.37032	0.050345	0.00405829	0.14334	0.0109307	0.0209044	0.000415997	136.014	9.70783	133.369	2.62777
GW03-20	227.179	289.148	0.785686	0.0488108	0.00286688	0.140793	0.00780471	0.0209177	0.00040185	133.75	6.94732	133.453	2.53844
GW03-05	148.975	155.358	0.958914	0.04881	0.00416534	0.150944	0.012	0.0224087	0.000431066	142.745	10.5871	142.861	2.71902
GW03-07	175.724	158.55	1.10832	0.0498766	0.00375378	0.15556	0.0105848	0.0230157	0.000365793	146.809	9.30134	146.687	2.30636
GW03-10	266.555	455.395	0.585328	0.0505263	0.00260453	0.153647	0.0075601	0.0221633	0.00033151	145.127	6.65476	141.314	2.0921
GW03-12	176.232	134.077	1.31441	0.0495358	0.0052546	0.147642	0.0140374	0.0221499	0.000585467	139.828	12.42	141.229	3.69316
GW03-15	467.118	493.725	0.946111	0.0490667	0.00277029	0.152313	0.00827174	0.0225836	0.000274716	143.952	7.28946	143.964	1.73356
GW03-18	256.369	185.833	1.37957	0.0498081	0.00297972	0.152788	0.00825415	0.02267	0.000374952	144.371	7.27097	144.509	2.3648
GW-02 (crystal tuff from the middle Gaowu Formation)
GW02-01	206.496	126.266	1.6354	0.0490555	0.00566283	0.139908	0.0153398	0.0208508	0.0007736	132.962	13.6643	133.031	4.88562
GW02-02	290.971	241.161	1.20654	0.0520852	0.00662637	0.147652	0.018446	0.0208095	0.000875974	139.836	16.3203	132.77	5.53224
GW02-05	149.802	181.375	0.825924	0.0488377	0.00972106	0.137063	0.0268661	0.0208313	0.00143189	130.425	23.9913	132.908	9.04249
GW02-06	194.221	269.925	0.719537	0.0509081	0.0107323	0.144637	0.0302901	0.0206864	0.00158236	137.165	26.8698	131.993	9.9941
GW02-07	232.095	195.554	1.18686	0.048144	0.0116077	0.139875	0.0335008	0.0207	0.0017927	132.932	29.8421	132.078	11.3223
GW02-08	288.095	187.317	1.53801	0.049917	0.00320354	0.139587	0.0076631	0.0207832	0.000330738	132.676	6.82849	132.604	2.08989
GW02-11	197	186.948	1.05376	0.0507466	0.00450769	0.143115	0.0121754	0.0207052	0.000413056	135.814	10.8153	132.111	2.60969
GW02-13	192.486	188.894	1.01902	0.0500481	0.00538924	0.138069	0.0130642	0.020673	0.000537618	131.322	11.6562	131.908	3.39626
GW02-14	248.304	295.643	0.839878	0.0514769	0.00292367	0.147273	0.00823854	0.0209032	0.000311286	139.501	7.29206	133.361	1.96691
GW02-18	278.382	302.111	0.921456	0.049639	0.00285607	0.138054	0.00710467	0.0206181	0.000360117	131.309	6.33948	131.561	2.27568
GW02-19	162.394	185.156	0.877067	0.049958	0.00412968	0.141257	0.0104676	0.020707	0.000443219	134.163	9.31352	132.123	2.80012
GW02-04	363.904	218.945	1.66208	0.0493833	0.00896456	0.147133	0.0260661	0.0217265	0.00130606	139.377	23.0726	138.558	8.2407
GW02-20	198.468	231.847	0.856029	0.0514252	0.00269559	0.152314	0.00725241	0.0219745	0.000311958	143.953	6.39134	140.123	1.96922
GW-04 (lithic crystal tuff from the lower Gaowu Formation)
GW04-01	523.481	342.571	1.5281	0.0520901	0.00220655	0.146738	0.00607559	0.0207917	0.000344002	139.027	5.38049	132.658	2.17359
GW04-02	408.929	344.713	1.18629	0.048693	0.00254701	0.139498	0.00751234	0.0208016	0.000357508	132.597	6.6947	132.72	2.25882
GW04-05	253.919	189.03	1.34328	0.0516018	0.00471971	0.145185	0.0132187	0.020937	0.000473185	137.652	11.7208	133.575	2.98866
GW04-06	195.749	215.141	0.909863	0.0463666	0.0030879	0.132693	0.0082908	0.0207921	0.00038062	126.514	7.43264	132.66	2.40473
GW04-07	657.102	682.757	0.962425	0.051041	0.00233355	0.145887	0.00635162	0.0207425	0.000250494	138.274	5.62903	132.347	1.58359
GW04-08	169.167	223.609	0.756531	0.0508632	0.00471435	0.143366	0.0121891	0.0209446	0.000447213	136.038	10.8251	133.623	2.8247
GW04-10	379.09	421.076	0.900289	0.0514266	0.00277076	0.148357	0.00783355	0.0209705	0.000308524	140.461	6.92712	133.787	1.94936
GW04-11	507.044	502.197	1.00965	0.046543	0.00263329	0.13263	0.00772617	0.0206642	0.000377371	126.458	6.92691	131.852	2.3845
GW04-12	330.631	191.77	1.72411	0.050389	0.0033062	0.140889	0.00795631	0.0208	0.000395586	133.835	7.08165	132.71	2.49918
GW04-13	673.551	799.186	0.842797	0.0489893	0.00132852	0.141059	0.00392598	0.0208045	0.000201391	133.986	3.49476	132.738	1.27381
GW04-14	207.6	291.823	0.711392	0.0522554	0.00251582	0.146141	0.00660019	0.0207308	0.000351844	138.499	5.84796	132.273	2.22321
GW04-15	185.326	136.326	1.35943	0.0548169	0.00645046	0.149578	0.0125781	0.0207996	0.000591185	141.539	11.1102	132.707	3.73406
GW04-17	249.033	290.149	0.858292	0.0488567	0.00327774	0.138529	0.00826876	0.0207834	0.000412765	131.733	7.37494	132.605	2.60766
GW04-19	204.322	290.452	0.70346	0.0494246	0.00411155	0.140188	0.0126484	0.0206751	0.000578762	133.212	11.2643	131.921	3.65606
DS-05 (lithic tuff from the upper Dashuang Formation)
DS05-01	818.547	616.588	1.32754	0.0496104	0.00184186	0.144734	0.00539172	0.0212312	0.000296043	137.252	4.78339	135.432	1.87017
DS05-03	175.922	180.596	0.974117	0.0497016	0.00419944	0.141899	0.0114343	0.0211658	0.000461022	134.734	10.1678	135.019	2.91125
DS05-04	380.859	497.084	0.766187	0.0457475	0.00247879	0.132256	0.00742947	0.020943	0.000331222	126.123	6.66314	133.613	2.09264
DS05-06	581.177	594.904	0.976925	0.0487996	0.00193072	0.141071	0.00551048	0.0210145	0.000232153	133.998	4.90435	134.065	1.46754
DS05-08	133.571	164.34	0.812773	0.0496467	0.00449517	0.142583	0.011686	0.0212238	0.000413332	135.341	10.3854	135.386	2.61016
DS05-09	234.213	392.234	0.597127	0.0502894	0.00220129	0.145821	0.00623682	0.0212416	0.000265627	138.215	5.52764	135.498	1.67832
DS05-10	603.759	416.895	1.44823	0.0781968	0.00555479	0.22723	0.0164112	0.0210189	0.000363032	207.91	13.579	134.092	2.29322
DS05-11	149.445	226.337	0.660276	0.0491425	0.00321094	0.144104	0.0089424	0.0214119	0.000323005	136.693	7.93685	136.573	2.03991
DS05-13	257.285	427.802	0.601412	0.0483106	0.00246102	0.14248	0.00740213	0.0211995	0.000270034	135.25	6.57931	135.232	1.70618
DS05-14	251.265	327.776	0.766573	0.0490795	0.0032808	0.142487	0.00946345	0.0211895	0.000346327	135.256	8.41113	135.169	2.18746
DS05-16	686.103	742.641	0.923868	0.0513657	0.0015722	0.150449	0.00464185	0.0212475	0.000200223	142.308	4.09803	135.535	1.26599
DS05-17	230.914	233.812	0.987606	0.0486408	0.00373997	0.140349	0.0107192	0.0212051	0.000404279	133.355	9.54492	135.267	2.55308
DS05-20	391.356	358.655	1.09118	0.0494779	0.00256879	0.145356	0.0073889	0.0212451	0.000272832	137.803	6.5511	135.52	1.72375
DS05-02	332.976	330.941	1.00615	0.0493186	0.00314622	0.153384	0.00923229	0.0227062	0.000342745	144.896	8.12825	144.736	2.16184
DS05-05	289.032	383.93	0.752825	0.0493415	0.00339147	0.149794	0.00993999	0.0222452	0.000354444	141.73	8.77853	141.83	2.23649
DS05-15	610.875	669.269	0.91275	0.0490814	0.00159486	0.1581	0.00514321	0.0234078	0.000298928	149.038	4.51054	149.157	1.88466
DS-04 (crystal tuff from the middle Dashuang Formation)
DS04-01	484.039	331.152	1.46168	0.0503787	0.00276967	0.144812	0.00737101	0.0211782	0.000304389	137.321	6.53834	135.098	1.92291
DS04-02	486.358	606.701	0.801643	0.0510758	0.00253482	0.150592	0.00763451	0.0212668	0.000276825	142.434	6.73806	135.657	1.7489
DS04-03	154.383	142.146	1.08609	0.0506385	0.00483946	0.136946	0.0105474	0.0204352	0.000431086	130.32	9.42011	130.406	2.72422
DS04-05	653.297	490.454	1.33202	0.0490828	0.00250658	0.138752	0.00709554	0.0206479	0.000307632	131.932	6.32747	131.749	1.9443
DS04-06	324.15	206.959	1.56625	0.053305	0.00524559	0.147604	0.0130837	0.0203786	0.000436905	139.794	11.5767	130.048	2.76112
DS04-07	127.243	83.3903	1.52587	0.0546001	0.0065035	0.15472	0.0160277	0.0208341	0.000711482	146.071	14.094	132.926	4.49347
DS04-08	141.387	136.499	1.03581	0.0499964	0.0042538	0.145327	0.0107573	0.021251	0.000475587	137.777	9.53729	135.557	3.00293
DS04-10	422.968	264.711	1.59785	0.0487253	0.00278233	0.142928	0.00786153	0.0212781	0.000293358	135.648	6.98483	135.728	1.85315
DS04-12	311.875	333.854	0.934165	0.0499567	0.00258883	0.144157	0.0072362	0.0212302	0.000281308	136.74	6.42245	135.426	1.77723
DS04-13	640.251	426.585	1.50088	0.0473713	0.00225526	0.139077	0.00642011	0.0212842	0.000258719	132.221	5.72364	135.767	1.6347
DS04-14	260.75	427.86	0.609429	0.0473096	0.00271933	0.138758	0.00756536	0.0214025	0.000345316	131.937	6.74631	136.514	2.18065
DS04-15	169.879	123.034	1.38075	0.0500625	0.00354192	0.142004	0.00853024	0.0211818	0.000381357	134.827	7.58499	135.12	2.40849
DS04-16	418.36	368.166	1.13634	0.0525896	0.00280258	0.155351	0.00790155	0.0213685	0.000317179	146.626	6.94501	136.299	2.00325
DS04-18	332.518	257.119	1.29325	0.0495322	0.00314763	0.142766	0.00872453	0.0212354	0.000313153	135.505	7.75256	135.459	1.97809
DS04-19	1003.35	353.962	2.83462	0.0483015	0.00236963	0.141191	0.00679235	0.0210311	0.000244338	134.104	6.04423	134.169	1.54436
DS04-20	228.517	154.692	1.47724	0.0489746	0.00327869	0.154065	0.00957195	0.0228098	0.000343388	145.494	8.42228	145.389	2.16568
DS-01 (breccia-bearing lithic tuff from the lower Dashuang Formation)
DS01-02	182.419	324.918	0.56143	0.0537701	0.00307356	0.159206	0.00892979	0.0213853	0.000395313	150.008	7.82253	136.405	2.49608
DS01-05	227.133	365.535	0.621371	0.0478199	0.0027421	0.138784	0.0075186	0.0212026	0.000370646	131.961	6.70447	135.252	2.34087
DS01-06	308.193	412.845	0.74651	0.0512265	0.00289898	0.151924	0.00906783	0.021463	0.00038457	143.61	7.99358	136.896	2.42813
DS01-07	437.987	407.213	1.07557	0.0521046	0.00319668	0.152624	0.00975704	0.0210822	0.000318471	144.226	8.59584	134.492	2.01192
DS01-08	317.33	445.682	0.712009	0.0480569	0.00220245	0.141758	0.00717586	0.0211629	0.000479927	134.608	6.38226	135.001	3.03057
DS01-09	124.552	254.782	0.488856	0.0496359	0.00376037	0.145929	0.0112548	0.0211855	0.000426925	138.311	9.97311	135.144	2.69603
DS01-10	114.585	274.78	0.417005	0.0584179	0.00505354	0.173443	0.0163569	0.0212786	0.000487317	162.403	14.1541	135.732	3.07687
DS01-11	447.653	549.439	0.814747	0.0470098	0.00325243	0.13773	0.00928509	0.0212186	0.000327479	131.02	8.28709	135.353	2.06849
DS01-14	613.998	798.758	0.768691	0.0637132	0.00272754	0.190531	0.00915724	0.0214131	0.000320664	177.082	7.81098	136.581	2.02514
DS01-17	297.042	364.255	0.815478	0.049233	0.00341163	0.142388	0.00939218	0.0211793	0.000380176	135.169	8.34851	135.105	2.40105
DS01-18	269.49	451.926	0.596315	0.050856	0.00255849	0.150113	0.00814045	0.0212494	0.000307778	142.011	7.18749	135.547	1.94416
DS01-20	206.314	495.655	0.416244	0.0526754	0.00380189	0.157845	0.0134275	0.0212328	0.000491022	148.815	11.7758	135.443	3.10038
DS01-01	50.4886	72.8152	0.69338	0.0533058	0.00576476	0.182415	0.0151498	0.0268247	0.000781517	170.137	13.0102	170.644	4.90723
DS01-03	171.643	231.902	0.740152	0.0476904	0.0025713	0.154619	0.00831988	0.0232865	0.00036325	145.982	7.31726	148.393	2.28977
DS01-04	326.26	474.053	0.688236	0.0485914	0.00179101	0.156227	0.00615332	0.023164	0.000278737	147.395	5.40469	147.621	1.75798
DS01-16	609.472	617.753	0.986595	0.050737	0.00163282	0.160637	0.00501495	0.0230421	0.000261271	151.26	4.38854	146.854	1.64824
DS01-19	231.118	361.937	0.638559	0.0516117	0.00252302	0.169275	0.00835274	0.0238221	0.000302832	158.79	7.25421	151.767	1.90852
Data in blue color are for older zircons.

## Sheet: Supplementary Table S2
Supplementary Table S2. Trace elements (ppm) in zircon from the volcanic rocks in SE Zhejiang Province acquired by LA-ICP-MS
Spot No.	XX01-01	XX01-02	XX01-03	XX01-05	XX01-06	XX01-08	XX01-12	XX01-19	XX01-20	XX01-04	XX01-10	XX01-15	XX01-17	TS01-01	TS01-02	TS01-03	TS01-04	TS01-05	TS01-06	TS01-08	TS01-10	TS01-11	TS01-13	TS01-15	TS01-16	TS01-17	TS01-18	TS01-19	TS01-20	TS01-07	TS01-09	TS01-12	TS01-14	CC01-02	CC01-04	CC01-11	CC01-14	CC01-15	CC01-17	CC01-20	CC01-03	CC01-12	CC01-16	CC01-18	JLP01-01	JLP01-03	JLP01-08	JLP01-10	JLP01-12
Na	0.57094	9.88429	12.8941	0.15857	329.534	1.96389	0.57443	0.09092	0.48377	0.58619	1.76231	4.54049	0.61873	10.2203	5.77989	31.5731	0	2.38179	4.17222	0.47078	0.0819	37.2085	1.16438	12.2429	0	0.58906	0	0	1.863	0.11162	0	4.30269	0.14009	0	7.30418	3.6314	1.32011	3.08267	4.04597	1.00874	1.56532	0	0.07228	3.85645	12.4808	0	3.3491	0	6.4308
Ca	154.464	2391.5	421.378	195.169	0	4.43577	0	163.115	77.868	0	103.024	2.75627	240.21	120.277	60.3531	1931.1	0	81.205	0	47.7213	0	2527.1	5.52673	0	57.7824	0	5.91345	56.9284	169.236	290.877	0	84.1929	34.7362	0.46426	0	95.687	84.2895	0	0	385.774	0	0	3.88406	560.827	98.5315	41.3429	0	100.154	41.9327
Fe	0	9.91687	0	4.58677	91.5069	1.81974	23.1289	1.42209	2.76925	0.32412	42.2327	1.4888	3.67377	4.70095	5.39252	20.2079	0	1.36324	0.000106381	2.54776	0	19.0971	31.2747	492.103	0	1.82568	0	0	9.74959	2.91916	0	0	0	7.40014	19.6388	12.072	105.12	215.483	113.169	0	0.09534	0	0	17.7108	72.4412	0	0.33217	26.0172	57.5825
Sr	5.00404	4.13067	5.34453	7.79892	4.5856	4.71878	5.06768	5.37592	7.18698	2.46767	5.23429	1.3187	3.95921	4.25613	3.87552	9.09328	4.98081	4.46585	2.88383	4.28295	5.81168	6.70404	2.12619	3.05267	2.70357	2.86631	3.64452	4.23177	3.44764	1.01087	3.75142	2.77441	1.22402	3.38994	5.59005	6.4413	7.30328	5.47349	6.41634	6.27373	2.1367	2.60762	3.35268	2.56168	5.85465	3.50056	4.43002	3.2655	5.01758
Nb	0	0	0	0	0	0	0	0	0	0	0	0	0	11.3071	6.15717	5.50885	7.23501	4.89342	4.21055	23.8546	27.8646	8.0791	10.5236	8.7931	7.78428	7.21931	13.5684	10.4399	14.9371	6.09492	1.84872	4.29442	1.25996	2.34635	24.9792	16.1324	19.012	15.3708	18.4713	25.2929	5.50343	2.96574	3.03753	4.90613	17.0348	2.58676	6.24625	10.5289	4.70828
Ti	6.75054	4.79594	5.22486	6.41704	11.9356	8.437	8.72486	10.502	10.0399	9.12787	4.30564	6.80263	3.79343	9.88083	3.66714	5.6577	3.59295	4.92143	6.45567	3.05301	4.57415	3.95896	2.94944	7.7429	2.7565	5.85558	3.90938	4.23631	3.41299	4.06293	5.89332	6.24952	10.3688	8.73191	3.29826	4.17291	4.54027	5.19048	6.26469	5.41847	14.69	9.57254	8.16579	4.59901	3.50258	6.34723	6.55797	6.85415	7.99064
Y	2004.05	2318.58	2648.11	5424.08	1169.37	3512	3211.36	2741.37	4406.13	1711.6	1876.94	1153.77	1295.47	2388.27	1627.72	2710.02	2234.56	2320.37	1369.57	2197.15	3013.71	1202.4	1371.2	1270.45	1273.9	1351.33	1327.44	1616.76	1551.86	1197.09	1168.57	1584.54	836.364	2105.08	3347.39	3006.44	3515.69	3133.97	3299.98	2988.8	1270.96	1228.83	2213.19	1394.59	3179.08	2144.78	2765.72	2418.63	2741.98
Zr	489700	489700	489700	489700	489700	489700	489700	489700	489700	489700	489700	489700	489700	489700	489700	489700	489700	489700	489700	489700	489700	489700	489700	489700	489700	489700	489700	489700	489700	489700	489700	489700	489700	489700	489700	489700	489700	489700	489700	489700	489700	489700	489700	489700	489700	489700	489700	489700	489700
La	0.03487	18.2411	2.25757	0.52077	0.10212	0.10834	0.39683	0.5953	0.07764	0.03909	0.52347	0.1112	1.18362	0.02551	1.37555	15.3935	0.01185	0.47849	0.02456	0.06493	0.05959	17.9568	0.02128	0.04079	0.00108	0.00106	0.00286	0.01152	1.1907	1.22246	0.01835	0.23982	0.1603	0.26552	0.02593	0.11726	0.2754	0.19804	0.96477	2.48422	0.04534	0.00816	0.23068	1.94625	0.90598	0.08336	0.34717	0.03862	0.24023
Ce	125.865	176.293	129.307	338.727	72.1636	318.97	319.855	223.247	310.35	14.9947	92.5577	8.69259	46.8968	110.589	66.0259	120.513	67.5295	69.3319	73.2272	73.9275	109.496	90.4604	52.5678	60.0016	45.2831	53.2392	53.1171	56.1129	77.2993	35.069	34.5351	70.7149	20.5835	102.777	139.803	133.616	127.714	108.933	129.117	195.007	32.9081	17.592	39.5122	67.0001	50.8832	33.7552	48.6973	76.1949	46.261
Pr	0.22536	6.41301	0.87714	1.44677	0.15324	0.461	1.04883	0.62735	0.53201	0.37296	0.32607	0.15826	0.43238	0.26412	0.47339	4.44178	0.12371	0.38781	0.11582	0.07482	0.12701	4.72863	0.05199	0.07167	0.02332	0.0834	0.03559	0.06661	0.44042	0.6442	0.14945	0.24584	0.24253	0.89351	0.12076	0.26444	0.24162	0.2161	0.40768	1.01912	0.21025	0.12977	0.51791	0.72781	0.49749	0.55967	0.72648	0.45364	0.76698
Nd	3.82011	31.3717	6.34777	21.9889	2.2121	8.8741	15.0425	9.40003	9.74225	6.72538	4.06602	2.70038	2.77688	4.84388	3.70933	23.7685	2.34017	5.25483	2.30726	1.23473	2.14948	23.6196	1.1208	1.3728	0.65441	1.57332	0.73462	1.39759	2.94757	3.87281	2.77274	3.34466	2.87383	14.4541	2.47267	3.15971	3.64521	2.98515	4.4943	6.98075	3.03332	2.05183	7.79208	4.73358	6.5106	8.95791	11.9328	8.2995	12.0598
Sm	8.296	14.1597	9.70459	39.8258	5.14442	21.7811	25.3078	18.6976	25.8319	12.6356	5.50941	5.62706	3.70843	10.2395	5.61726	15.3838	6.95889	9.83544	4.19709	4.06271	7.0955	6.1162	2.97716	3.45384	2.19139	3.70186	2.31692	3.37527	3.69386	3.58844	5.28231	6.10089	4.50906	20.1419	8.9691	8.48328	9.31438	8.97774	9.64449	10.5452	5.04104	4.1167	13.0047	6.37107	13.6137	14.6095	18.3382	15.6767	19.6879
Eu	2.89617	2.47111	2.12068	7.82148	1.54258	7.87686	10.6661	7.67554	7.85584	4.50615	1.1517	1.33512	0.8747	3.31801	1.29113	3.41364	1.50165	2.67234	1.93952	0.55783	1.02691	1.16834	0.79386	0.98803	0.44395	1.25666	0.60452	0.97028	0.90604	0.64504	2.11851	1.69239	1.43241	7.73838	1.74073	1.81394	1.8472	1.89439	1.96359	2.42352	1.4796	1.10505	3.14522	2.30616	0.42417	5.00803	1.0229	0.53553	1.30995
Gd	48.1604	55.395	53.9693	181.384	21.4222	109.063	116.148	88.8807	135.45	57.5504	26.2426	29.5893	20.8301	53.1182	29.983	63.3342	40.7842	51.3362	26.3651	29.2443	45.8943	19.6195	19.305	20.2004	17.0596	22.6244	17.3486	23.582	23.3226	20.1598	26.2507	33.7914	19.2747	76.2191	58.6451	53.8469	62.4125	57.8881	62.8027	64.7366	26.6058	23.1019	60.4008	37.1681	82.4956	66.5571	90.6317	78.9055	92.4618
Tb	16.1553	18.305	19.5392	54.6064	7.48285	34.1088	33.4701	26.1854	41.4531	16.976	9.12716	10.0348	7.83705	18.009	11.0486	20.7043	15.5641	17.6223	9.81739	12.3148	18.3869	6.86229	8.02139	7.48861	7.19215	8.21248	7.51001	9.4433	9.37387	7.32507	8.39679	11.7885	6.32155	21.4383	22.8652	20.0332	23.4473	21.1489	23.2639	23.1086	8.99197	8.03063	19.3231	12.1905	27.8449	20.254	27.1476	23.8262	26.5268
Dy	187.139	216.889	237.325	585.252	89.6545	370.023	346.757	284.84	456.843	182.389	118.996	114.276	101.894	216.461	138.743	249.257	193.464	210.736	119.149	170.494	245.399	90.4737	106.24	99.1919	99.6517	107.516	100.351	129.408	124.495	96.6238	99.3763	141.01	72.6904	222.389	291.161	257.938	304.882	272.048	290.955	278.162	108.698	99.4161	216.617	134.936	326.146	220.257	299.247	261.321	291.669
Ho	71.9025	84.217	94.0499	205.852	38.0416	132.791	121.13	103.338	164.884	65.9285	55.3795	41.0748	43.1825	84.8281	55.7085	95.74	78.2319	82.1086	48.2283	73.5602	103.078	38.6327	46.0092	42.0676	42.0952	45.5551	43.6212	55.155	52.3157	40.2899	38.0775	54.8757	27.4807	76.3947	116.478	103.509	123.065	107.543	113.748	106.548	42.685	39.7847	79.4652	47.2173	121.091	77.7662	106.604	93.5457	105.205
Er	319.861	376.54	429.502	845.481	188.037	549.189	503.695	429.052	689.622	273.138	305.476	172.796	214.284	387.439	268.152	440.625	365.622	381.651	225.739	370.038	503.249	198.205	231.088	211.083	210.387	228.941	224.773	275.616	260.601	195.946	177.931	251.543	127.769	325.322	548.353	482.655	580.263	505.567	530.615	476.185	200.552	191.242	353.879	198.913	520.032	334.181	445.316	385.975	440.141
Tm	67.7077	78.6762	92.7532	165.612	44.3423	108.615	101.021	85.2854	137.632	54.5406	81.4339	35.6505	48.7131	82.9431	59.3558	94.235	79.1105	81.4757	49.1943	84.0963	112.182	46.614	53.4717	49.6491	47.9757	53.5554	52.4403	62.6925	59.435	44.1739	38.7329	53.1848	27.2511	66.7258	117.093	103.776	122.207	109.649	113.217	100.079	43.6392	41.7798	72.3358	39.7342	103.569	67.8387	87.644	74.014	85.484
Yb	624.583	717.869	858.059	1442.5	449.158	944.308	897.619	777.656	1209.59	476.78	916.221	324.315	481.577	775.447	570.909	882.585	746.195	759.757	473.023	818.702	1064.53	477.212	516.154	494.528	468.327	535.636	521.883	613.61	577.933	428.956	370.201	506.92	261.928	611.082	1099.43	972.682	1142.44	1019.68	1053.28	921.192	407.525	394.619	656.731	363.025	906.495	613.484	764.203	645.555	751.305
Lu	128.394	144.634	175.247	283.527	105.762	182.519	182.343	160.87	243.644	97.3787	228.393	66.9473	105.289	162.722	120.066	181.515	154.282	158.029	103.179	169.496	221.985	105.321	111.556	109.858	97.7246	119.995	113.711	130.413	124.726	93.635	78.192	105.418	56.7559	125.857	222.131	203.094	230.545	209.429	214.191	184.508	87.4587	86.205	134.21	74.5287	180.386	129.091	151.537	127.924	153.621
Hf	9692.54	10520.2	10324.9	9447.77	11237	9535.12	8277.37	9109.66	9238.68	8885.28	13561.5	12428.3	12336.7	9936.13	11296.9	10790.3	11786.6	11077.7	9208.18	13080.3	12366.9	10909.8	11993.5	10903.5	13783.5	10269.8	11794.7	11722	12667.5	12491.7	10368.2	11031.7	10160.2	8801.17	12302.2	11359	12161.1	11867.2	12284.5	11875.2	9999.57	10122.5	11034.7	11998.3	11527.2	9464.45	9301.32	9404.68	8660.23
Ta	2.04715	2.04989	0.56673	1.65014	3.40702	1.02576	2.76716	2.07865	0.47108	1.25197	0.9348	1.06941	3.42837	2.61092	1.79965	1.706	2.2248	1.63308	1.08434	5.83683	5.78306	2.3918	2.93707	2.61745	2.63214	2.08034	3.74754	2.66229	4.4281	2.47413	0.7238	1.27869	0.54341	0.66614	5.89693	3.55506	4.31114	3.57466	4.25873	6.34512	1.10074	1.00595	1.11363	1.36161	4.0825	0.70754	1.49532	2.37542	1.10778
Pb	13.648	13.5047	16.3475	15.0351	7.63028	23.8706	9.55256	9.21506	20.3204	2.17376	13.0611	4.18657	10.0425	12.7574	7.11706	13.4055	9.37922	8.90194	4.21727	13.4674	15.11	6.43356	7.16688	7.29635	7.86153	6.3254	7.88826	8.40994	14.6499	9.09165	3.26635	7.57867	3.07315	6.45037	31.3949	23.2249	26.5803	23.3333	26.8692	36.36	9.09915	8.00395	11.3434	20.7838	24.978	6.938	12.4722	22.8363	9.91218
Th	1594.28	759.588	848.628	1730.45	421.29	2405.81	902.04	1166.37	2143.52	126.661	713.341	92.3369	373.99	674.606	309.134	577.554	408.129	407.67	146.855	428.045	606.378	191.634	207.732	279.543	211.209	202.604	185.893	272.002	546.7	208.466	105.902	230.355	113.062	386.984	1210.55	885.87	1084.27	951.061	1096.33	1695.29	278.763	194.53	389.038	699.393	921.178	331.497	615.949	1376.81	494.59
U	943.774	428.268	606.127	565.586	348.113	819.779	359.635	421.222	852.236	148.976	551.292	365.216	461.631	420.876	263.246	413.052	375.76	328.211	136.553	592.722	655.295	243.968	290.463	302.668	286.642	240.88	276.316	352.973	583.641	327.64	100.636	184.899	101.826	206.566	1264.67	940.009	1088.61	951.679	1059.65	1336.77	264.396	251.182	354.16	550.782	955.635	251.02	450.102	784.4	368.378
Zr/Hf	239211	238891	864080	296763	143733	477402	176968	235586	1.03953e+06	391144	523855	457916	142838	187558	272108	287046	220110	299863	451611	83898.3	84678.4	204741	166731	187090	186046	235394	130672	183939	110589	197928	676568	382970	901161	735131	83043.2	137747	113589	136992	114987	77177.4	444883	486804	439733	359648	119951	692116	327488	206153	442055
Ce/Ce*	348.105	3.99634	22.5296	95.6775	141.434	349.942	121.558	89.5667	374.39	30.4475	54.9282	16.0652	16.0728	330.312	20.0611	3.57332	432.352	39.4613	336.609	260.05	308.586	2.40692	387.499	272.068	2211.41	1388.42	1291.19	496.738	26.1714	9.68904	161.699	71.4042	25.5953	51.7347	612.503	186.043	121.389	129.102	50.477	30.0488	82.6369	132.574	28.0273	13.8023	18.5826	38.3154	23.7743	141.144	26.4236
Th/U	1.68926	1.77363	1.40008	3.05957	1.21021	2.9347	2.50821	2.76902	2.51517	0.850211	1.29394	0.252828	0.810149	1.60286	1.17431	1.39826	1.08614	1.2421	1.07544	0.722169	0.925352	0.785489	0.715173	0.923597	0.736838	0.8411	0.672754	0.770603	0.936706	0.636267	1.05233	1.24584	1.11034	1.87342	0.957203	0.942405	0.99601	0.999351	1.03462	1.2682	1.05434	0.774459	1.09848	1.26982	0.963943	1.3206	1.36846	1.75524	1.34262
Nb/Ta	0	0	0	0	0	0	0	0	0	0	0	0	0	4.33069	3.42132	3.2291	3.25198	2.99644	3.88305	4.08691	4.81832	3.37783	3.58302	3.35941	2.9574	3.47025	3.62061	3.92138	3.37325	2.46346	2.55419	3.35845	2.31862	3.52231	4.23597	4.53787	4.40998	4.29994	4.33727	3.9862	4.99975	2.9482	2.72759	3.60318	4.17265	3.65599	4.1772	4.43243	4.25019
Dy/Yb	0.299623	0.302129	0.276583	0.405721	0.199606	0.391845	0.386308	0.366281	0.377684	0.382543	0.129877	0.35236	0.211585	0.279144	0.243021	0.282417	0.259268	0.277373	0.251888	0.208249	0.230523	0.189588	0.20583	0.200579	0.212782	0.200726	0.192287	0.210896	0.215415	0.225253	0.268439	0.278169	0.277521	0.363927	0.264829	0.265182	0.26687	0.266797	0.276237	0.301958	0.266727	0.251929	0.329841	0.371697	0.359789	0.359026	0.39158	0.4048	0.388216
δCe	163.268	3.98777	22.5269	63.5211	115.377	196.316	82.2099	80.0354	171.098	11.9785	53.6203	13.3046	16.0555	125.147	20.0029	3.5256	163.199	37.1364	180.911	227.593	225.277	2.35477	269.665	211.625	591.911	197.189	448.947	244.581	26.1503	9.5991	68.3772	64.1978	20.8299	31.9096	330.924	133.194	112.639	114.452	50.4594	30.0468	44.7256	41.0508	20.0972	13.794	18.3549	17.6695	17.465	50.4244	16.6367
Eu/Eu*	0.442964	0.269745	0.283294	0.281339	0.449232	0.49408	0.601448	0.575621	0.406022	0.510867	0.292825	0.316326	0.304259	0.434952	0.304155	0.334342	0.272507	0.363585	0.563675	0.156457	0.173975	0.326068	0.320134	0.361627	0.221981	0.419802	0.291507	0.332488	0.298431	0.231854	0.550012	0.36035	0.469736	0.603797	0.232041	0.259468	0.23422	0.254048	0.24392	0.283575	0.390588	0.346422	0.343086	0.458165	0.0386959	0.490994	0.0767072	0.0465505	0.093864
δEu	0.346068	0.235318	0.224279	0.235974	0.385821	0.40354	0.503414	0.477134	0.32718	0.428486	0.242586	0.254687	0.240142	0.351603	0.2438	0.287985	0.212265	0.293381	0.429463	0.113912	0.131294	0.297442	0.241397	0.281866	0.157274	0.322685	0.209368	0.244549	0.226998	0.182985	0.450201	0.285636	0.400709	0.530981	0.174492	0.197022	0.174708	0.191919	0.183673	0.217662	0.314134	0.273498	0.286224	0.357394	0.029825	0.41179	0.0628865	0.0379632	0.0780672
T (K)	1015.49	984.57	992.141	1010.79	1071.61	1036.74	1040.01	1058.48	1053.93	1044.45	975.201	1016.21	964.424	1052.33	961.583	999.28	959.876	986.841	1011.34	946.49	980.435	968.031	943.701	1028.46	938.281	1002.4	966.964	973.807	955.611	970.234	1002.98	1008.35	1057.18	1040.09	952.794	972.515	979.789	991.553	1008.57	995.392	1093.62	1049.16	1033.57	980.906	957.757	1009.78	1012.8	1016.92	1031.48
T (℃)	742.345	711.42	718.991	737.639	798.457	763.587	766.86	785.325	780.783	771.298	702.051	743.063	691.274	779.181	688.433	726.13	686.726	713.691	738.195	673.34	707.285	694.881	670.551	755.305	665.131	729.246	693.814	700.657	682.461	697.084	729.83	735.2	784.033	766.939	679.644	699.365	706.639	718.403	735.423	722.242	820.474	776.014	760.42	707.756	684.607	736.629	739.652	743.768	758.328
D Cezircon/melt	2.18408	3.05915	2.24382	5.87781	1.25223	5.53497	5.55032	3.87392	5.38539	0.260197	1.60612	0.150839	0.813784	1.13873	0.679867	1.24092	0.695349	0.713909	0.754019	0.761229	1.12748	0.931468	0.541289	0.617835	0.466279	0.548203	0.546946	0.577793	0.795948	0.361105	0.355607	0.728149	0.211948	1.50475	2.04684	1.95626	1.86984	1.59487	1.89038	2.85508	0.481804	0.257562	0.578494	0.98094	0.636216	0.422056	0.608885	0.9527	0.578422
Ce4+/Ce3+Melt	0.00261745	0.00521696	0.00337508	0.00829875	0.00244796	0.00651695	0.0109941	0.00659104	0.00649339	0.000869522	0.00224199	0.000350551	0.00141441	0.00293498	0.00220062	0.00317678	0.00186699	0.00206295	0.00383042	0.00166357	0.00230556	0.00343968	0.00177074	0.0019826	0.00142407	0.00206759	0.00187123	0.00170986	0.00169916	0.00111105	0.00198123	0.00281836	0.00117098	0.00556767	0.00294092	0.00340752	0.00289159	0.00266766	0.00292726	0.00386253	0.00164804	0.000948406	0.00159456	0.00203969	0.00105243	0.00141663	0.00152162	0.00172485	0.00166037
log fO2	-14.8313	-14.3389	-14.9186	-12.9314	-13.7709	-12.7862	-11.8085	-12.3145	-12.4334	-16.1227	-16.0287	-18.3079	-17.0905	-14.0485	-16.5952	-15.0622	-16.923	-16.1001	-14.4648	-17.4597	-16.058	-15.6612	-17.4225	-15.2334	-17.9406	-15.7373	-16.7448	-16.7357	-17.1928	-17.5709	-15.7982	-15.0648	-15.5452	-13.1942	-16.3131	-15.5717	-15.6827	-15.5464	-14.9967	-14.8146	-14.2351	-16.0792	-15.5048	-16.2624	-17.8627	-16.119	-15.9273	-15.6184	-15.3678
DFMQ	1.23165	2.49443	1.72162	3.24571	1.00919	2.77459	3.67679	2.75351	2.73593	-0.739123	1.04789	-2.26229	0.271964	1.1567	0.843629	1.39863	0.561965	0.675072	1.69878	0.393145	0.882157	1.60478	0.508326	0.520652	0.143056	0.646037	0.549645	0.377567	0.40827	-0.363338	0.570706	1.17189	-0.44847	2.28919	1.36512	1.57559	1.27425	1.10875	1.23452	1.74356	0.0779176	-0.802625	0.129561	0.6655	-0.320192	0.0827313	0.200786	0.410267	0.315358
Age (Ma)	93.2661	94.5128	94.2133	93.7704	95.577	93.8245	95.4686	94.09	95.4263	143.732	115.513	126.241	132.367	108.9	108.028	109.341	108.797	109.051	110.662	108.88	109.075	109.346	113.18	108.103	108.465	108.991	109.193	109	109	131.293	125.152	129.473	124.993	111.185	111.687	109.703	110.471	110.069	110.987	112.619	133.515	137.76	132.69	156.309	118.926	118.72	119.254	119.634	121.087
Data in blue color are for older zircons.
[truncated: 166 more columns]

## Sheet: Supplementary Table S3
Supplementary Table S3. Major element contents (wt.%) of volcanic roccks in SE Zhejiang Province
Age (Ma)	94	109	111	120	125	130	131	131	132	132	132	132	135	135	136
Sample	XX-01	TS-01	CC-01	JLP-01	CW-01	XST-03	XST-02	XST-01	GW-03	GW-02	GW-01	GW-04	DS-05	DS-04	DS-01
SiO2	80.94	73.16	75.32	76.44	74.99	78.53	65.09	72.09	72.37	76.52	78.28	75.86	74.5	75.85	75.44
TiO2	0.1	0.24	0.11	0.07	0.18	0.13	0.56	0.28	0.25	0.2	0.19	0.05	0.15	0.11	0.1
Al2O3	10.2	13.77	13.22	12.7	12.5	11.98	16.37	13.62	13.56	12.71	12.28	12.24	13.08	13.09	11.97
Fe2O3T	0.75	1.52	0.79	1.04	1.36	0.83	3.47	1.86	1.93	1.07	0.97	1.15	1.39	1.59	1.5
MnO	0.02	0.08	0.06	0.01	0.1	0.02	0.09	0.07	0.06	0.02	0.01	0.07	0.06	0.02	0.06
MgO	0.17	0.46	0.25	0.11	0.31	0.09	0.94	0.47	0.51	0.13	0.2	0.11	0.26	0.2	0.57
CaO	0.18	1.04	0.28	0.19	0.54	0.06	2.5	1.84	1.34	0.12	0.06	1.38	0.77	0.09	1.71
Na2O	1.8	3.57	3.93	2.97	3.65	1.2	5	2.88	3.46	4.23	2.63	1.52	3.9	4.29	2.46
K2O	3.93	4.6	4.65	5.48	4.18	6.43	3.85	4.79	3.91	4.05	4.36	4.74	4.2	3.08	2.45
P2O5	0.01	0.05	0.01	0.01	0.07	0.01	0.15	0.06	0.05	0.02	0.02	0.01	0.03	0.01	0.01
LOI	1.43	1.69	0.81	0.94	1.32	1.12	2.23	2.43	2.29	0.77	1.35	2.27	1.48	1.15	3.04
Total	99.52	100.18	99.42	99.96	99.2	100.4	100.25	100.39	99.73	99.84	100.35	99.39	99.82	99.48	99.31
Mg#	30.982	37.4743	38.5266	17.3191	31.1021	17.6783	34.9164	33.3525	34.3542	19.3947	28.9943	15.9263	27.0308	19.9431	42.9408
K2O/Na2O	2.18333	1.28852	1.18321	1.84512	1.14521	5.35833	0.77	1.66319	1.13006	0.957447	1.65779	3.11842	1.07692	0.717949	0.995935
Na2O+K2O	5.73	8.17	8.58	8.45	7.83	7.63	8.85	7.67	7.37	8.28	6.99	6.26	8.1	7.37	4.91
A/CNK	1.35035	1.07924	1.09972	1.1361	1.08468	1.32219	0.965381	1.02505	1.09569	1.09831	1.33957	1.20501	1.05688	1.23914	1.21891
Fe2O3T, total Fe; LOI, loss on ignition; Mg# = 100*mol MgO/(mol MgO + FeO); A/CNK = mol Al2O3/(mol Na2O + K2O + CaO)

## Sheet: Supplementary Table S4
Supplementary Table S4. Trace and rare earth element (ppm) analyses of volcanic rocks in SE Zhejiang Province
Age (Ma)	94	109	111	120	125	130	131	131	132	132	132	132	135	135	136
Sample	XX-01	TS-01	CC-01	JLP-01	CW-01	XST-03	XST-02	XST-01	GW-03	GW-02	GW-01	GW-04	DS-05	DS-04	DS-01
Li	51.7517	68.5906	31.7133	92.6142	112.26	15.155	57.3647	22.3397	16.5022	18.7474	29.8611	52.762	35.6986	30.0856	20.9925
Be	7.08454	6.05654	5.72213	5.30102	5.33818	3.22024	2.76198	4.52073	1.9693	1.16177	1.63489	5.26386	4.53311	5.46203	1.70921
Sc	4.63611	8.73594	8.42456	7.74126	9.4279	4.83504	10.9848	6.85036	6.66008	6.53033	4.49771	6.94551	8.00074	7.8191	5.16372
V	4.84853	13.285	3.52488	3.55882	17.3577	4.84853	45.3822	20.2668	14.8365	4.43155	7.35037	1.38668	8.97947	4.49943	6.75885
Cr	3.93246	6.19511	5.37008	5.24658	7.09424	3.92258	9.01107	7.98349	4.39685	3.48784	3.5076	6.63974	4.43637	3.40879	4.1696
Co	0.451612	1.81442	0.384817	0.28612	1.43559	0.307056	5.57287	2.2431	2.30292	0.651995	0.493483	0.294096	1.07669	0.491489	0.649005
Ni	3.1455	3.52793	3.7048	7.55302	6.36748	2.69614	5.46877	9.56079	3.10726	3.22198	1.39587	6.98893	3.59486	1.71138	2.42844
Cu	1.23088	3.18271	1.3188	1.67048	3.89486	2.67277	6.04011	3.11237	2.67277	2.26834	2.16283	1.04625	2.61123	2.34747	2.03095
Zn	47.7707	73.1282	43.402	43.7819	47.5808	44.5417	85.6644	60.9718	60.212	29.4412	44.6367	103.519	58.3126	85.6644	55.3685
Ga	13.9536	16.8264	17.4933	14.0562	13.338	12.5172	20.6226	17.2368	15.903	11.3886	12.312	19.3914	15.8004	21.1356	15.6978
Ge	1.65801	1.72178	1.21098	1.28814	1.90033	1.26008	1.53047	1.17974	1.04454	0.908077	1.11597	2.20642	1.73453	1.61974	1.12107
As	0.979108	7.7937	10.5352	10.966	2.33419	4.04959	2.95299	2.77283	1.32375	5.11486	7.62138	58.6682	2.18537	1.06527	1.74673
Rb	163.905	179.703	193.032	189.577	215.249	254.744	152.056	197.476	184.64	141.195	158.968	286.34	183.652	203.4	141.195
Sr	37.0621	223.371	55.5308	49.9153	213.388	49.9153	575.274	277.03	195.918	131.028	88.1005	45.0486	136.019	45.6725	188.43
Y	15.4736	24.4268	21.118	28.9035	23.9402	15.8628	23.259	21.5073	20.1448	20.8261	16.836	62.7702	35.7157	38.538	25.4
Zr	101.634	188.321	125.049	147.468	163.411	147.468	258.07	167.397	153.447	189.318	166.4	158.429	167.397	193.303	142.486
Nb	14.9819	19.3884	22.7483	15.8632	13.8803	18.1766	14.2108	13.66	13.7701	14.9819	12.8889	35.0312	21.4814	32.7179	14.1006
Mo	0.0724522	0.263463	0.156715	0.271412	0.132867	1.66935	0.375889	0.292989	0.180563	6.20046	9.58459	0.255513	0.67342	0.11924	0.0763133
Ag	0.335	1.35	0.4345	0.332	0.307	0.43	0.368	0.314	0.339	0.465	0.388	0.808	0.486	0.714	0.324
Cd	0.0264758	0.0588673	0.0417017	0.045193	0.050236	0.0491693	0.0729295	0.0557639	0.0524666	0.0628435	0.0549881	0.0667228	0.0510119	0.0745782	0.0439323
In	0.0223797	0.0364706	0.0355899	0.0721124	0.0421692	0.0488002	0.0546023	0.0266277	0.0293216	0.0205147	0.0270421	0.113971	0.0523229	0.10247	0.0580214
Sn	1.01362	1.48744	2.1232	1.88329	1.61939	2.54304	1.34349	1.60739	1.8473	1.60739	1.25953	3.91053	2.24316	4.57028	1.99125
Sb	0.205873	0.398626	0.577252	0.519728	0.245231	0.682206	0.402663	0.507618	0.285598	1.25138	1.2312	2.82571	0.289635	0.28358	0.117065
Cs	3.66955	5.50433	2.68121	3.72024	9.22456	3.95338	3.84188	6.91335	3.07148	1.56108	5.44351	9.78209	8.55553	4.69338	6.65993
Ba	94.4367	1020.37	230.625	74.2375	659.079	335.266	1332.73	1041.2	900.637	1062.02	906.884	143.685	744.457	210.322	490.405
La	26.0624	49.2181	32.1177	38.4638	45.3427	19.7648	52.8029	54.1593	50.3808	47.7648	46.8929	26.8374	43.3081	42.8236	59.2943
Ce	57.6281	97.116	68.3019	79.9778	90.6015	40.9912	101.225	105.234	100.223	96.3142	97.0157	69.254	91.1026	89.2986	111.247
Pr	5.1389	9.37436	6.25119	8.44178	8.87893	3.30288	10.4915	10.2001	9.70465	10.2001	9.81151	7.93663	9.36465	11.0744	11.7544
Nd	17.2304	31.9846	20.6352	31.8814	32.191	11.2462	37.2466	34.8736	33.5323	36.0085	35.0799	32.81	34.0481	42.0959	42.0959
Sm	2.97782	5.20323	3.86268	5.73309	5.42577	2.49034	5.99802	5.28801	5.20323	5.91324	5.54234	9.64346	6.60206	9.42092	6.99416
Eu	0.317746	0.934123	0.394411	0.165781	0.769657	0.22214	1.55856	0.961188	0.879027	1.12586	0.917413	0.138652	0.604077	0.201259	0.964833
Gd	2.42382	4.00022	3.15256	4.78914	4.27168	2.33156	4.83936	3.95655	4.06156	4.75143	4.1689	10.1719	5.81316	8.04415	5.6493
Tb	0.370699	0.60854	0.507736	0.746043	0.62898	0.395784	0.701447	0.643845	0.605753	0.694944	0.616902	1.7002	0.920708	1.25424	0.861247
Dy	2.30552	3.52115	3.16485	4.5272	3.61547	2.65134	4.07657	3.43732	3.38492	3.78314	3.28012	11.5276	5.86859	7.89116	4.68439
Ho	0.474353	0.746899	0.654837	0.955989	0.742738	0.571097	0.802032	0.706329	0.707369	0.755221	0.635592	2.35096	1.22749	1.56037	0.899815
Er	1.37441	2.21101	1.89729	2.65919	2.1413	1.51385	2.15126	1.96203	2.01182	2.15126	1.76284	6.43385	3.45595	4.12324	2.37037
Tm	0.223355	0.349687	0.316335	0.398198	0.316335	0.232451	0.310271	0.295111	0.296122	0.330484	0.243568	1.02076	0.577084	0.594265	0.327452
Yb	1.44246	2.34653	2.12305	2.76302	2.27542	1.5542	2.09258	2.05195	2.05195	2.15353	1.54404	6.7958	3.8601	3.8601	2.23479
Lu	0.223254	0.376224	0.322477	0.411365	0.36072	0.209817	0.328679	0.312141	0.319377	0.328679	0.221186	1.01188	0.601544	0.569503	0.34625
Hf	3.01413	4.72623	4.06497	4.80825	4.30589	4.798	6.26405	4.90052	4.62371	5.58741	4.839	6.83817	5.22858	7.32002	4.42892
Ta	1.04899	1.27639	1.73303	1.02331	0.885772	1.38276	0.913281	1.10767	1.21221	1.09667	0.966464	3.17264	1.67251	2.60413	1.31674
W	0.34	0.847	2.785	4.46	1.8	22.7	2.19	1.46	2.39	5.66	4.32	1.72	11.9	2.08	1.34
Tl	0.680176	0.81873	0.838673	0.977228	0.629792	1.68994	0.690672	1.04021	0.965682	0.980377	1.09164	1.61647	0.864915	0.949937	0.663381
Pb	8.63599	27.5105	29.5137	18.3403	17.8952	27.6886	24.3944	31.5169	25.1067	24.6615	30.6266	45.4057	17.8952	42.2896	25.6409
Bi	0.0674107	0.287368	0.159798	0.100445	0.112262	0.456566	0.0890304	0.196055	0.0800334	0.0899704	0.0704992	0.0946704	0.00997732	0.0616364	0.0394796
Th	15.4903	19.1178	23.7256	16.3727	15.5883	21.0786	14.5099	20.6864	21.0786	17.5491	16.1766	38.6277	20.7844	39.412	23.2354
U	2.77938	3.79734	3.99178	3.56858	1.53266	4.47216	3.03101	3.86596	3.58002	3.48852	3.7859	5.91332	2.848	6.24502	2.19605
∑REE	118.193	207.991	143.702	181.914	197.562	87.4776	224.625	224.081	213.362	212.275	207.733	187.633	207.354	222.812	249.725
LREE/HREE	12.3735	13.6883	10.8379	9.54565	12.7649	8.24701	13.6793	15.766	14.8765	13.2003	15.6544	3.57497	8.28814	6.98693	13.3738
(La/Yb)N	12.1814	14.1411	10.1993	9.38541	13.4347	8.57374	17.0122	17.7948	16.5533	14.9535	20.4754	2.66247	7.56407	7.47946	17.8879
(La/Sm)N	5.5054	5.95011	5.23033	4.22023	5.25677	4.99235	5.53762	6.44249	6.09066	5.08107	5.32214	1.75058	4.12631	2.85932	5.33274
(Gd/Yb)N	1.35595	1.37564	1.19825	1.39869	1.5149	1.21056	1.86618	1.55595	1.59725	1.78041	2.17876	1.20784	1.21524	1.68162	2.03988
δEu	0.361627	0.626045	0.345583	0.0967366	0.488818	0.281874	0.884514	0.642516	0.584654	0.649437	0.583563	0.0428044	0.298144	0.0706883	0.469318
V/Sc	1.04582	1.52072	0.418405	0.459721	1.8411	1.00279	4.13136	2.95851	2.22768	0.678611	1.63425	0.199651	1.12233	0.575441	1.30891
Ce/Pb	6.67302	3.53014	2.31424	4.36076	5.06289	1.48044	4.14952	3.33897	3.99188	3.90544	3.1677	1.52523	5.0909	2.1116	4.33867
Nb/U	5.39039	5.10578	5.69878	4.44524	9.05635	4.06438	4.68847	3.5334	3.84639	4.29464	3.40444	5.92412	7.54263	5.23903	6.4209
Sr/Y	2.39519	9.14449	2.62954	1.72697	8.91336	3.14668	24.7334	12.8807	9.72545	6.29152	5.23286	0.717675	3.80838	1.18513	7.41851
tZr	780.745	805.58	773.855	792.821	796.693	808.871	807.035	789.487	789.173	811.462	820.281	806.748	794.815	824.569	798.143
Ave [εHf(t)]	-4.5	-5	-3.8	-3.5	-5.7	-10.9	-9.8	-9.8	-10.3	-11	-	-9.6	-5.1	-9.6	-10.5

## Sheet: Supplementary Table S5
Supplementary Table S5. Zircon in-situ Hf isotopic compositions from the volcanic rocks in SE Zhejiang Province
Sample no.	Age (Ma)	176Hf/177Hf	2σ	176Lu/177Hf	2σ	176Yb/177Hf	2σ	εHf(t)	2σ	TDM1(Ga)	TDM2(Ga)	fLu/Hf	Note
XX-01-01	93.2661	0.28254	1.3e-05	0.0025256	9.4e-06	0.0980587	0.00036	-6.32585	0.502557	1.05014	1.55409	-0.923928	magmatic zircon with rock-forming age
XX-01-02	94.5128	0.282602	1.2e-05	0.00214892	8.4e-06	0.0813769	0.00042	-4.06632	0.471514	0.948689	1.4122	-0.935273	magmatic zircon with rock-forming age
XX-01-03	94.2133	0.282628	1.4e-05	0.00162835	6.5e-06	0.0618321	0.00034	-3.12747	0.537418	0.898433	1.35259	-0.950953	magmatic zircon with rock-forming age
XX-01-05	93.7704	0.282614	1.5e-05	0.00248026	4.1e-05	0.0991184	0.0017	-3.67764	0.568137	0.939783	1.38697	-0.925293	magmatic zircon with rock-forming age
XX-01-06	95.577	0.282573	1.2e-05	0.00239523	1.1e-05	0.0830945	0.00046	-5.11057	0.4708	0.998506	1.47903	-0.927854	magmatic zircon with rock-forming age
XX-01-08	93.8245	0.282612	1.2e-05	0.00470166	1.2e-05	0.184865	0.00068	-3.88505	0.464409	1.00428	1.39973	-0.858384	magmatic zircon with rock-forming age
XX-01-12	95.4686	0.282574	1.4e-05	0.00462261	4.2e-05	0.175163	0.0015	-5.21796	0.53003	1.06215	1.48526	-0.860765	magmatic zircon with rock-forming age
XX-01-19	94.09	0.282578	1.3e-05	0.00332077	1.5e-05	0.120566	0.00046	-5.01448	0.500472	1.01681	1.47164	-0.899977	magmatic zircon with rock-forming age
XX-01-20	95.4263	0.282613	1.4e-05	0.00508523	3.6e-05	0.196918	0.0012	-3.83661	0.528956	1.01384	1.3978	-0.84683	magmatic zircon with rock-forming age
XX-01-04	143.732	0.282311	1.5e-05	0.00147425	1e-05	0.0564671	0.00045	-13.2888	0.570603	1.34488	2.03104	-0.955595	Type 1 older zircon
XX-01-10	115.513	0.282473	1.1e-05	0.00256906	3.4e-05	0.0784038	0.0011	-8.2444	0.438674	1.14938	1.69196	-0.922619	Type 1 older zircon
XX-01-15	126.241	0.282442	1.2e-05	0.002127	5.9e-05	0.0822495	0.0022	-9.06907	0.471641	1.17959	1.75216	-0.935934	Type 1 older zircon
XX-01-17	132.367	0.282391	1.3e-05	0.00140241	5.2e-06	0.0514494	0.00019	-10.6909	0.505668	1.22923	1.85916	-0.957759	Type 1 older zircon
TS-01-01	108.9	0.28257	1.2e-05	0.00174038	4.9e-06	0.0662967	0.00012	-4.89459	0.472728	0.984992	1.47558	-0.947579	magmatic zircon with rock-forming age
TS-01-02	108.028	0.28257	1.3e-05	0.00143264	1.2e-05	0.055724	0.0006	-4.88723	0.505572	0.976724	1.47451	-0.956848	magmatic zircon with rock-forming age
TS-01-03	109.341	0.282549	1.2e-05	0.00238202	1.5e-05	0.0906515	0.00053	-5.64986	0.47087	1.032	1.52354	-0.928252	magmatic zircon with rock-forming age
TS-01-04	108.797	0.28258	1.8e-05	0.00218546	1.7e-05	0.0724695	0.00055	-4.56088	0.668939	0.981885	1.4543	-0.934173	magmatic zircon with rock-forming age
TS-01-05	109.051	0.282581	1.3e-05	0.00191732	6.3e-06	0.0745467	0.00017	-4.50449	0.504253	0.973436	1.45098	-0.942249	magmatic zircon with rock-forming age
TS-01-06	110.662	0.282574	1.4e-05	0.00155218	1.3e-05	0.0575522	0.00055	-4.69559	0.537646	0.974012	1.46436	-0.953247	magmatic zircon with rock-forming age
TS-01-08	108.88	0.282598	1.1e-05	0.00176907	5.7e-06	0.0684776	0.00014	-3.89604	0.441162	0.945115	1.41236	-0.946715	magmatic zircon with rock-forming age
TS-01-10	109.075	0.282541	1.2e-05	0.00140286	1.2e-06	0.0539541	9.8e-05	-5.88182	0.473707	1.01687	1.53821	-0.957745	magmatic zircon with rock-forming age
TS-01-11	109.346	0.282545	1.4e-05	0.00144544	8.8e-06	0.0533267	0.0003	-5.7377	0.537909	1.01234	1.52929	-0.956463	magmatic zircon with rock-forming age
TS-01-13	113.18	0.282585	1.2e-05	0.00167335	9.4e-06	0.0646358	0.00045	-4.26285	0.472942	0.961442	1.43886	-0.949598	magmatic zircon with rock-forming age
TS-01-15	108.103	0.282529	1.4e-05	0.00104686	2.6e-06	0.0388276	5.3e-05	-6.29775	0.538935	1.02401	1.56384	-0.968468	magmatic zircon with rock-forming age
TS-01-16	108.465	0.282596	1.3e-05	0.00117834	8.8e-06	0.0472261	0.00035	-3.94367	0.506283	0.933498	1.41516	-0.964508	magmatic zircon with rock-forming age
TS-01-17	108.991	0.28255	1.4e-05	0.00173772	1.4e-05	0.0656867	0.00052	-5.59289	0.537157	1.01331	1.51981	-0.947659	magmatic zircon with rock-forming age
TS-01-18	109.193	0.282554	1.3e-05	0.00129344	2.4e-06	0.0471567	0.00011	-5.39744	0.505953	0.994918	1.50769	-0.961041	magmatic zircon with rock-forming age
TS-01-07	131.293	0.282437	1.3e-05	0.0013117	8.4e-06	0.0500548	0.00031	-9.08904	0.50593	1.16171	1.75745	-0.960491	Type 1 older zircon
TS-01-09	125.152	0.282607	1.3e-05	0.00132407	4.1e-06	0.05099	0.00011	-3.19186	0.505933	0.920665	1.38018	-0.960118	Type 2 older zircon
TS-01-12	129.473	0.28258	1.3e-05	0.00149124	1.4e-05	0.0574718	0.00054	-4.09136	0.505477	0.964152	1.44037	-0.955083	Type 2 older zircon
TS-01-14	124.993	0.282428	1.5e-05	0.00106048	7.4e-06	0.0409043	0.00025	-9.50182	0.571595	1.16591	1.77882	-0.968058	Type 1 older zircon
CC-01-02	111.185	0.282651	2e-05	0.00210824	1.6e-05	0.0706393	0.00028	-1.99829	0.73676	0.876974	1.29384	-0.936499	magmatic zircon with rock-forming age
CC-01-04	111.687	0.282624	9.7e-06	0.00209459	2.1e-05	0.0785828	0.00038	-2.95617	0.4001	0.9164	1.35492	-0.93691	magmatic zircon with rock-forming age
CC-01-11	109.703	0.282621	1.1e-05	0.00256388	3e-06	0.100865	0.00011	-3.123	0.438718	0.932116	1.36391	-0.922775	magmatic zircon with rock-forming age
CC-01-14	110.471	0.282565	1.1e-05	0.00212325	9.4e-06	0.0824815	0.00046	-5.04197	0.440056	1.00152	1.48601	-0.936047	magmatic zircon with rock-forming age
CC-01-15	110.069	0.282572	1e-05	0.00205069	4.8e-06	0.080105	0.00027	-4.79734	0.409355	0.989418	1.47025	-0.938232	magmatic zircon with rock-forming age
CC-01-17	110.987	0.282581	9.2e-06	0.00207912	4.3e-06	0.0790666	0.00016	-4.46217	0.385072	0.977154	1.44974	-0.937376	magmatic zircon with rock-forming age
CC-01-20	112.619	0.282592	1.1e-05	0.00169042	3.6e-06	0.0657055	9.4e-05	-4.02821	0.441417	0.951852	1.42358	-0.949084	magmatic zircon with rock-forming age
CC-01-03	133.515	0.282408	1.5e-05	0.00105296	1.5e-05	0.0388001	0.00061	-10.0346	0.571634	1.19402	1.81879	-0.968284	Type 1 older zircon
CC-01-12	137.76	0.282451	1.1e-05	0.00130987	4.9e-06	0.0490621	0.0002	-8.46427	0.442637	1.14215	1.72292	-0.960546	Type 1 older zircon
CC-01-16	132.69	0.282357	1.2e-05	0.00132678	1.8e-05	0.0506639	0.00072	-11.9015	0.47394	1.27558	1.93562	-0.960037	Type 1 older zircon
CC-01-18	156.309	0.282447	1.1e-05	0.000684633	7.4e-06	0.0241572	0.00024	-8.13911	0.444683	1.12856	1.71653	-0.979379	Type 1 older zircon
GT-01-02	118.532	0.282475	1.4e-05	0.00140758	1.8e-06	0.0554564	4.8e-05	-8.00378	0.538012	1.11012	1.67937	-0.957603	magmatic zircon with rock-forming age
GT-01-03	120.306	0.28255	1.5e-05	0.00282788	2.7e-05	0.110104	0.00098	-5.42291	0.567372	1.04318	1.51739	-0.914823	magmatic zircon with rock-forming age
GT-01-04	117.683	0.282661	1.5e-05	0.00129598	1.4e-05	0.0481119	0.00056	-1.43704	0.571064	0.843294	1.26329	-0.960964	magmatic zircon with rock-forming age
GT-01-05	116.894	0.282776	1.6e-05	0.00170366	2e-05	0.0600627	0.00072	2.57564	0.603164	0.687419	1.00778	-0.948685	magmatic zircon with rock-forming age
GT-01-07	116.696	0.282544	1.6e-05	0.00318794	1.7e-05	0.12497	0.00057	-5.7602	0.599777	1.06374	1.53589	-0.903978	magmatic zircon with rock-forming age
GT-01-08	114.951	0.282498	1.3e-05	0.00421636	7.8e-06	0.170069	0.00032	-7.50726	0.498193	1.16629	1.64458	-0.873001	magmatic zircon with rock-forming age
GT-01-09	116.035	0.282654	1.5e-05	0.00140777	5.9e-06	0.0522381	0.00018	-1.73156	0.570783	0.855941	1.28071	-0.957597	magmatic zircon with rock-forming age
GT-01-11	117.54	0.282615	1.3e-05	0.00136574	6.2e-06	0.0506433	0.00022	-3.07266	0.505798	0.910318	1.36685	-0.958863	magmatic zircon with rock-forming age
GT-01-12	115.359	0.282457	1.3e-05	0.00170911	1.1e-05	0.0655138	0.00045	-8.75143	0.504799	1.14573	1.72407	-0.948521	magmatic zircon with rock-forming age
GT-01-13	115.506	0.282466	1.3e-05	0.00211037	6.5e-06	0.0859166	0.00023	-8.45357	0.503712	1.14497	1.70528	-0.936435	magmatic zircon with rock-forming age
GT-01-15	116.231	0.282642	1.5e-05	0.00081919	3.2e-06	0.0295863	9.9e-05	-2.09961	0.572228	0.859193	1.30426	-0.975326	magmatic zircon with rock-forming age
GT-01-16	115.829	0.282613	1.6e-05	0.000958524	8e-06	0.035123	0.00035	-3.14119	0.604838	0.903032	1.36995	-0.971129	magmatic zircon with rock-forming age
GT-01-17	116.12	0.282479	1.4e-05	0.000968032	5.5e-06	0.0357635	0.00016	-7.87219	0.53915	1.09132	1.66936	-0.970842	magmatic zircon with rock-forming age
GT-01-18	115.04	0.282492	1.4e-05	0.00156244	6.2e-06	0.0571492	0.0002	-7.48411	0.537607	1.09038	1.6439	-0.952938	magmatic zircon with rock-forming age
GT-01-06	146.679	0.282422	1.5e-05	0.000908959	6.2e-06	0.0342369	0.00026	-9.24895	0.572031	1.17006	1.77921	-0.972622	Type 2 older zircon
JLP-01-01	118.926	0.282586	1.6e-05	0.00245128	1.3e-05	0.0911263	0.00043	-4.17233	0.601425	0.980741	1.43734	-0.926166	magmatic zircon with rock-forming age
JLP-01-03	118.72	0.282525	1.3e-05	0.00192292	1.9e-05	0.0727194	0.00069	-6.29638	0.50425	1.0547	1.57158	-0.942081	magmatic zircon with rock-forming age
JLP-01-08	119.254	0.282559	1e-05	0.00225059	1.3e-05	0.0854719	0.00054	-5.09784	0.408715	1.01432	1.49616	-0.932211	magmatic zircon with rock-forming age
JLP-01-10	119.634	0.28262	1.1e-05	0.00236365	2.1e-05	0.0909511	0.00073	-2.94477	0.439364	0.928588	1.36019	-0.928806	magmatic zircon with rock-forming age
JLP-01-12	121.087	0.282613	1.4e-05	0.00327714	1.3e-05	0.132254	0.00086	-3.24294	0.533344	0.963311	1.38002	-0.901291	magmatic zircon with rock-forming age
JLP-01-16	116.957	0.282581	1.3e-05	0.00234812	7.2e-06	0.0926159	0.00035	-4.38482	0.503112	0.9854	1.44931	-0.929273	magmatic zircon with rock-forming age
JLP-01-18	120.459	0.282643	1.7e-05	0.00250112	2.8e-05	0.104172	0.0015	-2.11114	0.634742	0.897792	1.30799	-0.924665	magmatic zircon with rock-forming age
JLP-01-19	120.339	0.282708	1.9e-05	0.00420894	5.7e-05	0.176847	0.0037	0.032133	0.69897	0.842871	1.1718	-0.873225	magmatic zircon with rock-forming age
JLP-01-20	119.381	0.282608	1.3e-05	0.00269497	2.2e-05	0.105151	0.00092	-3.41117	0.502203	0.955259	1.38947	-0.918826	magmatic zircon with rock-forming age
JLP-01-02	140.455	0.282554	1.3e-05	0.00171757	2.9e-05	0.0737283	0.0016	-4.80518	0.504886	1.00746	1.4938	-0.948266	Type 2 older zircon
JLP-01-04	130.28	0.282594	1.1e-05	0.00273953	5.3e-06	0.110264	0.00028	-3.66195	0.438232	0.975914	1.4136	-0.917484	Type 2 older zircon
JLP-01-05	129.786	0.282581	1.2e-05	0.00199031	4.9e-06	0.0759357	0.00015	-4.07809	0.472068	0.975226	1.43968	-0.940051	Type 2 older zircon
JLP-01-06	139.999	0.282576	1.2e-05	0.00128822	1.5e-05	0.0471102	0.00053	-3.97547	0.474151	0.963886	1.44104	-0.961198	Type 2 older zircon
JLP-01-07	144.711	0.282374	1.3e-05	0.00125344	5.9e-06	0.046071	0.00025	-11.0078	0.50611	1.24788	1.88842	-0.962246	Type 1 older zircon
JLP-01-09	200.133	0.282315	1.5e-05	0.000944197	6.5e-06	0.0353498	0.00028	-11.9106	0.572069	1.32119	1.98682	-0.97156	Type 1 older zircon
JLP-01-13	135.04	0.282593	1.2e-05	0.00281811	1.6e-05	0.114567	0.00049	-3.61899	0.469716	0.979971	1.41448	-0.915117	Type 2 older zircon
JLP-01-15	127.089	0.282581	1.1e-05	0.00219634	2.1e-05	0.0867434	0.00085	-4.14048	0.439888	0.980289	1.44155	-0.933845	Type 2 older zircon
CW-01-01	115.729	0.282598	1.4e-05	0.00189923	7.6e-06	0.0735087	0.00024	-3.77419	0.536777	0.948888	1.40982	-0.942794	magmatic zircon with rock-forming age
CW-01-02	126.149	0.282617	1.4e-05	0.00281243	1.5e-05	0.107385	0.00055	-2.93769	0.534509	0.943893	1.36461	-0.915288	magmatic zircon with rock-forming age
CW-01-03	127.404	0.282445	1.4e-05	0.0015559	1e-05	0.0597809	0.00044	-8.91217	0.537646	1.15809	1.74331	-0.953135	magmatic zircon with rock-forming age
CW-01-04	126.267	0.282513	1.4e-05	0.00128577	4.9e-06	0.050873	0.00015	-6.48321	0.538362	1.05262	1.58922	-0.961272	magmatic zircon with rock-forming age
CW-01-05	124.854	0.282521	1.3e-05	0.00133912	1e-05	0.0512173	0.00046	-6.23445	0.505863	1.04278	1.57242	-0.959665	magmatic zircon with rock-forming age
CW-01-06	124.581	0.28258	1.4e-05	0.00120832	3.6e-06	0.04573	0.00013	-4.16007	0.538578	0.956459	1.44106	-0.963605	magmatic zircon with rock-forming age
CW-01-08	122.519	0.282476	1.6e-05	0.000766255	1.3e-06	0.0275171	8.6e-05	-7.84677	0.605269	1.09055	1.67263	-0.97692	magmatic zircon with rock-forming age
CW-01-09	122.438	0.282473	1.4e-05	0.00104293	1.1e-05	0.0400862	0.00048	-7.95934	0.538971	1.10206	1.6796	-0.968587	magmatic zircon with rock-forming age
CW-01-10	125.77	0.282346	1.3e-05	0.00170734	1.9e-05	0.0671225	0.00085	-12.4398	0.5048	1.30319	1.96416	-0.948574	magmatic zircon with rock-forming age
CW-01-11	116.075	0.282671	1.9e-05	0.00125864	1.6e-05	0.0474827	0.00055	-1.11794	0.704548	0.828397	1.24183	-0.962089	magmatic zircon with rock-forming age
CW-01-13	125.491	0.282575	1.2e-05	0.0025553	3.3e-05	0.100786	0.0014	-4.43653	0.470436	0.999697	1.459	-0.923033	magmatic zircon with rock-forming age
CW-01-14	125.56	0.282571	1.3e-05	0.0016105	4.9e-06	0.0631137	0.00021	-4.49818	0.505134	0.979974	1.46313	-0.951491	magmatic zircon with rock-forming age
CW-01-15	125.756	0.282605	1.4e-05	0.0027328	5.9e-05	0.106616	0.0023	-3.37408	0.534724	0.95995	1.39195	-0.917687	magmatic zircon with rock-forming age
CW-01-16	125.436	0.282602	1.3e-05	0.00169296	1.7e-05	0.0643144	0.00067	-3.41101	0.50492	0.937724	1.39422	-0.949007	magmatic zircon with rock-forming age
CW-01-18	125.168	0.282495	1.1e-05	0.00139788	1.1e-05	0.0505692	0.00032	-7.14889	0.442338	1.08118	1.63041	-0.957895	magmatic zircon with rock-forming age
CW-01-19	125.266	0.282537	1.3e-05	0.00217917	9.4e-06	0.0834354	0.00035	-5.7506	0.503577	1.0444	1.54198	-0.934362	magmatic zircon with rock-forming age
CW-01-17	153.429	0.282556	1.3e-05	0.00216798	2e-05	0.0807723	0.00072	-4.48501	0.503697	1.01595	1.48329	-0.934699	Type 2 older zircon
XST-03-04	130.309	0.282393	1.4e-05	0.00152614	5e-06	0.0571279	0.00013	-10.6812	0.537715	1.23075	1.85696	-0.954032	magmatic zircon with rock-forming age
XST-03-06	129.455	0.28244	1.5e-05	0.00102835	8.5e-06	0.0393237	0.00035	-8.99387	0.571691	1.14865	1.75015	-0.969026	magmatic zircon with rock-forming age
XST-03-07	129.494	0.282382	1.5e-05	0.00140042	3.1e-05	0.0552493	0.0014	-11.0731	0.570768	1.24203	1.88107	-0.957819	magmatic zircon with rock-forming age
XST-03-08	127.735	0.282447	1.4e-05	0.00220484	4.5e-05	0.0926616	0.0019	-8.86809	0.536002	1.17486	1.74059	-0.933589	magmatic zircon with rock-forming age
XST-03-13	130.499	0.282425	1.4e-05	0.00123803	3e-06	0.04745	0.00014	-9.52744	0.538471	1.1765	1.78451	-0.96271	magmatic zircon with rock-forming age
XST-03-14	130.386	0.282269	1.4e-05	0.0010025	7.2e-06	0.0369054	0.00031	-15.0244	0.539037	1.38719	2.1303	-0.969804	magmatic zircon with rock-forming age
XST-03-15	131.983	0.282365	1.7e-05	0.0012146	7.9e-06	0.0501447	0.00027	-11.5988	0.637477	1.25954	1.91609	-0.963416	magmatic zircon with rock-forming age
XST-03-16	129.293	0.282377	1.3e-05	0.00150713	2e-05	0.0617805	0.00092	-11.2774	0.505369	1.25324	1.89374	-0.954605	magmatic zircon with rock-forming age
XST-03-17	130.299	0.282371	1.4e-05	0.0013467	9.5e-06	0.052917	0.00046	-11.423	0.538172	1.25508	1.90371	-0.959437	magmatic zircon with rock-forming age
XST-03-18	130.659	0.282404	1.2e-05	0.00136503	1.8e-06	0.0530524	8.2e-05	-10.2602	0.473835	1.20948	1.83077	-0.958885	magmatic zircon with rock-forming age
XST-02-01	130.128	0.282388	1.3e-05	0.00131754	2.1e-06	0.0533321	0.00012	-10.8298	0.505894	1.2304	1.86625	-0.960315	magmatic zircon with rock-forming age
XST-02-02	131.208	0.282391	1.5e-05	0.000818965	5.6e-06	0.0317656	0.00029	-10.6682	0.572199	1.2105	1.85705	-0.975332	magmatic zircon with rock-forming age
XST-02-04	130.947	0.282405	1.4e-05	0.00125951	1.4e-05	0.0496346	0.00061	-10.2344	0.538411	1.20566	1.82939	-0.962063	magmatic zircon with rock-forming age
XST-02-05	131.11	0.282421	1.3e-05	0.00130624	1e-05	0.0485718	0.00035	-9.6584	0.50594	1.18414	1.79321	-0.960655	magmatic zircon with rock-forming age
XST-02-06	131.098	0.282437	1.3e-05	0.00142891	3.2e-06	0.0530102	0.00013	-9.10683	0.505606	1.1655	1.7584	-0.95696	magmatic zircon with rock-forming age
XST-02-07	131.004	0.282445	1.4e-05	0.00159961	1.9e-05	0.0615138	0.00084	-8.83353	0.537545	1.15916	1.74104	-0.951819	magmatic zircon with rock-forming age
XST-02-08	132.134	0.282408	1.3e-05	0.00133853	1.5e-05	0.0532524	0.00057	-10.1101	0.50585	1.20396	1.82243	-0.959683	magmatic zircon with rock-forming age
XST-02-09	130.803	0.282406	1.3e-05	0.00154893	7.4e-07	0.0575597	0.0001	-10.2236	0.505265	1.21346	1.82851	-0.953345	magmatic zircon with rock-forming age
XST-02-10	130.657	0.28247	1.4e-05	0.00193944	5e-05	0.0758854	0.002	-7.9964	0.536695	1.13434	1.68789	-0.941583	magmatic zircon with rock-forming age
XST-02-11	131.341	0.282451	1.2e-05	0.0016741	4.7e-06	0.0646516	0.00019	-8.62071	0.472948	1.15293	1.72786	-0.949575	magmatic zircon with rock-forming age
XST-02-12	131.771	0.282373	1.1e-05	0.00150089	8.6e-06	0.0567242	0.00035	-11.3417	0.441989	1.25771	1.89965	-0.954793	magmatic zircon with rock-forming age
XST-02-13	131.285	0.282385	1.2e-05	0.00163094	1.7e-05	0.0660607	0.00068	-10.9422	0.473053	1.24518	1.87409	-0.950875	magmatic zircon with rock-forming age
XST-02-14	130.635	0.282419	1.2e-05	0.00151631	6.3e-06	0.0586706	0.00033	-9.74317	0.473396	1.19309	1.79813	-0.954328	magmatic zircon with rock-forming age
XST-02-15	130.747	0.282454	1.4e-05	0.000953523	4.1e-06	0.0356201	0.00018	-8.45761	0.539223	1.12649	1.71732	-0.971279	magmatic zircon with rock-forming age
XST-02-17	130.871	0.282405	1.4e-05	0.000979957	9.2e-06	0.0384935	0.0004	-10.18	0.53914	1.19549	1.82599	-0.970483	magmatic zircon with rock-forming age
XST-02-18	130.612	0.282433	1.6e-05	0.0008263	2.6e-06	0.0315295	7.2e-05	-9.19944	0.60514	1.1523	1.76404	-0.975111	magmatic zircon with rock-forming age
XST-02-19	130.801	0.282397	1.3e-05	0.00110351	1.1e-06	0.0406079	7.2e-05	-10.4858	0.506492	1.21106	1.84516	-0.966762	magmatic zircon with rock-forming age
XST-02-20	129.9	0.282432	1.2e-05	0.00124275	1.2e-05	0.0470714	0.00042	-9.29644	0.474204	1.16691	1.7695	-0.962568	magmatic zircon with rock-forming age
XST-01-01	131.546	0.282391	1.2e-05	0.00171985	6e-06	0.0651259	0.00025	-10.75	0.472794	1.24031	1.86216	-0.948197	magmatic zircon with rock-forming age
XST-01-02	130.442	0.282362	1.3e-05	0.00164633	2.7e-05	0.0638369	0.001	-11.7889	0.504989	1.279	1.92674	-0.950412	magmatic zircon with rock-forming age
XST-01-03	131.921	0.282444	1.2e-05	0.00136533	7.7e-06	0.0518971	0.00036	-8.80809	0.473852	1.15248	1.7402	-0.958876	magmatic zircon with rock-forming age
XST-01-04	130.098	0.282371	1.5e-05	0.00128671	1.4e-06	0.0513878	9e-05	-11.4503	0.571038	1.25421	1.90531	-0.961244	magmatic zircon with rock-forming age
XST-01-05	131.564	0.282418	1.3e-05	0.00104307	1.4e-05	0.0399548	0.00065	-9.73205	0.50667	1.1801	1.79827	-0.968582	magmatic zircon with rock-forming age
XST-01-06	133.912	0.282409	1.2e-05	0.00195749	3.6e-05	0.0799832	0.0015	-10.0673	0.472127	1.22174	1.82087	-0.941039	magmatic zircon with rock-forming age
XST-01-07	130.99	0.282412	1.3e-05	0.000974277	1.5e-06	0.0363527	3.7e-05	-9.95056	0.506856	1.18635	1.81163	-0.970654	magmatic zircon with rock-forming age
XST-01-08	130.724	0.282535	1.3e-05	0.00141702	3.5e-06	0.0544949	9.2e-05	-5.64346	0.505669	1.02592	1.53949	-0.957319	magmatic zircon with rock-forming age
XST-01-09	131.713	0.282413	1.4e-05	0.0018224	2e-05	0.0710696	0.00078	-9.98071	0.536966	1.21241	1.81381	-0.945108	magmatic zircon with rock-forming age
XST-01-10	130.632	0.282388	1.4e-05	0.000899031	8.5e-06	0.0332288	0.00034	-10.8007	0.539346	1.21752	1.86494	-0.972921	magmatic zircon with rock-forming age
XST-01-11	129.719	0.282418	1.3e-05	0.00124448	1.2e-05	0.0477945	0.00049	-9.77796	0.506106	1.186	1.79971	-0.962516	magmatic zircon with rock-forming age
XST-01-14	130.225	0.282425	1.5e-05	0.000575689	4.7e-06	0.0208828	0.00018	-9.44791	0.572811	1.15501	1.77949	-0.98266	magmatic zircon with rock-forming age
XST-01-15	128.821	0.282401	1.4e-05	0.000818498	1.2e-05	0.0308407	0.00048	-10.362	0.539556	1.19641	1.83597	-0.975346	magmatic zircon with rock-forming age
XST-01-16	134.544	0.282408	1.4e-05	0.000857907	1.7e-06	0.0323806	5.9e-05	-9.99179	0.539471	1.18774	1.81693	-0.974159	magmatic zircon with rock-forming age
XST-01-17	131.326	0.282402	1.4e-05	0.00129802	5.8e-06	0.0483085	0.0002	-10.3182	0.538311	1.21043	1.83494	-0.960903	magmatic zircon with rock-forming age
XST-01-18	129.835	0.28245	1.3e-05	0.00127917	8.5e-06	0.0486122	0.00022	-8.6465	0.50602	1.14192	1.72846	-0.961471	magmatic zircon with rock-forming age
XST-01-19	129.982	0.282418	1.3e-05	0.00128114	1.9e-05	0.0498845	0.00079	-9.78969	0.506007	1.18773	1.80064	-0.961411	magmatic zircon with rock-forming age
XST-02-03	152.382	0.282412	1.3e-05	0.00125167	2.7e-06	0.0483407	0.00011	-9.52953	0.50615	1.1954	1.80108	-0.962299	Type 2 older zircon
XST-01-13	154.795	0.282412	1.3e-05	0.00136462	2e-05	0.051214	0.00072	-9.47593	0.505849	1.19844	1.79948	-0.958897	Type 2 older zircon
GW03-01	130.24	0.282443	1.5e-05	0.00122837	2.2e-05	0.0484746	0.00088	-8.87412	0.571205	1.14997	1.74313	-0.963001	magmatic zircon with rock-forming age
GW03-02	131.392	0.282358	1.3e-05	0.000843386	7.6e-06	0.0323201	0.00035	-11.8444	0.507205	1.25768	1.93123	-0.974597	magmatic zircon with rock-forming age
GW03-03	131.263	0.282361	1.3e-05	0.00151778	7.8e-06	0.0579718	0.0003	-11.7783	0.505338	1.2753	1.92673	-0.954284	magmatic zircon with rock-forming age
GW03-04	132.756	0.282383	1.2e-05	0.00169167	1.9e-05	0.0662995	0.00077	-10.9805	0.47288	1.24978	1.87759	-0.949046	magmatic zircon with rock-forming age
GW03-06	130.893	0.282376	1.4e-05	0.00145355	9.2e-06	0.0576859	0.00032	-11.257	0.537899	1.25216	1.89367	-0.956218	magmatic zircon with rock-forming age
GW03-08	131.512	0.282376	1.2e-05	0.00132219	2.7e-05	0.0536829	0.0012	-11.229	0.47396	1.24763	1.89242	-0.960175	magmatic zircon with rock-forming age
GW03-09	132.402	0.282401	1.3e-05	0.00104171	1.7e-05	0.0392818	0.00061	-10.3155	0.506671	1.2039	1.83566	-0.968623	magmatic zircon with rock-forming age
GW03-11	133.313	0.282394	1.1e-05	0.00160086	6.6e-06	0.062779	0.00035	-10.5753	0.441688	1.23123	1.85253	-0.951781	magmatic zircon with rock-forming age
GW03-13	132.228	0.282398	1.4e-05	0.00134511	7.4e-06	0.0509806	0.00028	-10.4412	0.53819	1.21746	1.84335	-0.959485	magmatic zircon with rock-forming age
GW03-14	133.016	0.28238	1.2e-05	0.000964576	5.1e-06	0.0369499	0.00022	-11.0137	0.475019	1.22984	1.88012	-0.970947	magmatic zircon with rock-forming age
GW03-16	134.81	0.282547	1.1e-05	0.00110377	1.6e-05	0.0444824	0.00076	-5.08741	0.443318	0.999772	1.50749	-0.966754	magmatic zircon with rock-forming age
GW03-17	130.239	0.2824	1.4e-05	0.000978522	2.1e-05	0.0385868	0.00089	-10.3949	0.539142	1.20342	1.83906	-0.970526	magmatic zircon with rock-forming age
GW03-19	133.369	0.282383	1.2e-05	0.00150475	1.3e-05	0.0579068	0.00063	-10.969	0.473427	1.24423	1.87738	-0.954676	magmatic zircon with rock-forming age
GW03-20	133.453	0.282409	1.4e-05	0.000865862	4.2e-06	0.033112	0.00021	-10.0052	0.539447	1.18757	1.81695	-0.97392	magmatic zircon with rock-forming age
GW-02-01	133.031	0.282387	1.5e-05	0.00137832	9e-06	0.0543507	0.0004	-10.8234	0.570828	1.23437	1.86801	-0.958484	magmatic zircon with rock-forming age
GW-02-02	132.77	0.282365	1.3e-05	0.00116925	5.4e-06	0.0441224	0.00019	-11.5994	0.506305	1.25887	1.91673	-0.964782	magmatic zircon with rock-forming age
GW-02-05	132.908	0.28239	1.3e-05	0.000891446	1.2e-06	0.0342088	9.1e-05	-10.6594	0.507086	1.21365	1.85775	-0.973149	magmatic zircon with rock-forming age
GW-02-06	131.993	0.282397	1.4e-05	0.00120691	3.1e-06	0.0456802	0.00012	-10.4589	0.538548	1.21397	1.84433	-0.963647	magmatic zircon with rock-forming age
GW-02-07	132.078	0.282421	1.4e-05	0.00140566	6.9e-06	0.0563044	0.00035	-9.64666	0.53804	1.18729	1.79316	-0.957661	magmatic zircon with rock-forming age
GW-02-08	132.604	0.282414	1.5e-05	0.00148219	1.2e-05	0.0589707	0.00046	-9.88287	0.570581	1.19937	1.80842	-0.955356	magmatic zircon with rock-forming age
GW-02-11	132.111	0.282362	1.3e-05	0.00142135	1.1e-05	0.0555363	0.00048	-11.7415	0.505606	1.27159	1.92509	-0.957188	magmatic zircon with rock-forming age
GW-02-13	131.908	0.282326	1.6e-05	0.00116719	1.4e-05	0.0461034	0.0005	-12.9759	0.604321	1.31273	2.00267	-0.964844	magmatic zircon with rock-forming age
GW-02-14	133.361	0.282362	1.4e-05	0.000807451	1.9e-06	0.031959	5e-05	-11.6469	0.539586	1.25051	1.92029	-0.975679	magmatic zircon with rock-forming age
GW-02-18	131.561	0.282402	1.5e-05	0.000987619	5.5e-06	0.0367764	0.0002	-10.2968	0.571786	1.20091	1.83387	-0.970252	magmatic zircon with rock-forming age
GW-04-01	132.658	0.282402	1.2e-05	0.00138341	9.4e-06	0.0549551	0.0004	-10.2905	0.473787	1.2129	1.83417	-0.958331	magmatic zircon with rock-forming age
GW-04-02	132.72	0.282396	1.2e-05	0.00113376	3.5e-06	0.0428841	0.00011	-10.4972	0.474521	1.214	1.84731	-0.965851	magmatic zircon with rock-forming age
GW-04-05	133.575	0.282448	1.4e-05	0.00114627	9.8e-06	0.0442635	0.00041	-8.6124	0.538727	1.14014	1.72916	-0.965474	magmatic zircon with rock-forming age
GW-04-06	132.66	0.282389	1.3e-05	0.00137176	7.1e-06	0.0486848	0.0003	-10.7458	0.505753	1.23077	1.86284	-0.958682	magmatic zircon with rock-forming age
GW-04-07	132.347	0.282424	1.3e-05	0.00238206	2e-05	0.0943847	0.00077	-9.62034	0.503018	1.21475	1.7914	-0.928251	magmatic zircon with rock-forming age
GW-04-08	133.623	0.282439	1.6e-05	0.00203957	6.5e-05	0.0894862	0.0034	-9.01929	0.602381	1.18125	1.7546	-0.938567	magmatic zircon with rock-forming age
GW-04-10	133.787	0.282388	1.4e-05	0.00093331	2.4e-06	0.0365547	8.1e-05	-10.7328	0.539265	1.21848	1.86302	-0.971888	magmatic zircon with rock-forming age
GW-04-11	131.852	0.282482	1.1e-05	0.00262994	5.5e-05	0.111506	0.0026	-7.60032	0.438557	1.13812	1.66363	-0.920785	magmatic zircon with rock-forming age
GW-04-12	132.71	0.282471	1.2e-05	0.00253482	2.6e-06	0.0957816	0.00017	-7.94606	0.470473	1.15048	1.6861	-0.92365	magmatic zircon with rock-forming age
GW-04-13	132.738	0.282347	1.4e-05	0.00083108	8.3e-06	0.0288392	0.00033	-12.1965	0.539518	1.27231	1.9544	-0.974967	magmatic zircon with rock-forming age
GW-04-14	132.273	0.282411	1.6e-05	0.00178995	1.1e-05	0.0684576	0.00033	-10.0335	0.602911	1.21406	1.81756	-0.946086	magmatic zircon with rock-forming age
GW-04-15	132.707	0.282473	1.4e-05	0.00182732	1.5e-05	0.0716513	0.00055	-7.8062	0.536973	1.1253	1.67747	-0.94496	magmatic zircon with rock-forming age
GW-04-17	132.605	0.282463	1.4e-05	0.0018902	9.9e-06	0.0761532	0.00046	-8.17819	0.536808	1.14202	1.70084	-0.943066	magmatic zircon with rock-forming age
GW-04-19	131.921	0.282368	1.5e-05	0.00088572	8e-07	0.0333079	3e-05	-11.4865	0.572029	1.24528	1.90909	-0.973322	magmatic zircon with rock-forming age
GW03-05	142.861	0.282389	1.3e-05	0.00122687	3.9e-06	0.0463443	0.00015	-10.5385	0.506183	1.22687	1.85749	-0.963046	Type 2 older zircon
GW03-07	146.687	0.282415	1.4e-05	0.0014094	1.9e-05	0.0566946	0.00087	-9.54848	0.538073	1.19577	1.79795	-0.957548	Type 2 older zircon
GW03-10	141.314	0.282381	1.2e-05	0.00117014	2.8e-06	0.0436853	0.00011	-10.8277	0.474434	1.23542	1.87456	-0.964755	Type 2 older zircon
GW03-12	141.229	0.282382	1.4e-05	0.00121348	1.6e-05	0.0471625	0.0006	-10.8017	0.538555	1.23558	1.87285	-0.963449	Type 2 older zircon
GW03-15	143.964	0.282345	1.3e-05	0.00111205	9.5e-06	0.0430955	0.00037	-12.0431	0.506491	1.28417	1.95305	-0.966505	Type 2 older zircon
GW03-18	144.509	0.282418	1.2e-05	0.0014659	7.7e-06	0.0564856	0.00035	-9.49004	0.473585	1.19318	1.79261	-0.955846	Type 2 older zircon
GW-02-04	138.558	0.282249	1.4e-05	0.00102324	7.7e-06	0.0412797	0.00036	-15.5598	0.539001	1.41587	2.16998	-0.969179	Type 1 older zircon
DS-05-01	135.432	0.282649	1.4e-05	0.002957	2.3e-05	0.115044	0.00062	-1.65318	0.534187	0.90107	1.29029	-0.910934	magmatic zircon with rock-forming age
DS-05-03	135.019	0.282438	1.1e-05	0.00198129	2.9e-06	0.0756954	9.1e-05	-9.03837	0.440522	1.18154	1.75687	-0.940322	magmatic zircon with rock-forming age
DS-05-04	133.613	0.282586	1.1e-05	0.00221673	1.7e-05	0.0857283	0.00074	-3.84571	0.439845	0.97415	1.42784	-0.933231	magmatic zircon with rock-forming age
DS-05-06	134.065	0.282563	1.3e-05	0.00192242	7.3e-06	0.0757182	0.00016	-4.61336	0.504306	0.999087	1.47679	-0.942096	magmatic zircon with rock-forming age
DS-05-08	135.386	0.282607	1.4e-05	0.00148696	9e-06	0.0553399	0.00038	-3.00469	0.537896	0.925263	1.37606	-0.955212	magmatic zircon with rock-forming age
DS-05-09	135.498	0.28257	1.1e-05	0.0016339	5e-06	0.0611621	0.00024	-4.30314	0.441655	0.981021	1.45831	-0.950786	magmatic zircon with rock-forming age
DS-05-10	134.092	0.282409	1.7e-05	0.00157394	8.6e-06	0.0642946	0.00021	-10.0508	0.636709	1.21001	1.82009	-0.952592	magmatic zircon with rock-forming age
DS-05-11	136.573	0.282551	1.2e-05	0.00206721	6.7e-06	0.074551	0.0003	-5.01317	0.471855	1.02097	1.50394	-0.937735	magmatic zircon with rock-forming age
DS-05-13	135.232	0.282601	1.1e-05	0.0015575	1.1e-05	0.0588806	0.00037	-3.21232	0.441906	0.935021	1.38908	-0.953087	magmatic zircon with rock-forming age
DS-05-14	135.169	0.282569	1.1e-05	0.00181231	4.7e-06	0.068834	0.00019	-4.37194	0.441096	0.987629	1.46238	-0.945412	magmatic zircon with rock-forming age
DS-05-16	135.535	0.282573	1.7e-05	0.00217708	1.5e-05	0.0855497	0.00055	-4.24847	0.635454	0.991386	1.45478	-0.934425	magmatic zircon with rock-forming age
DS-05-17	135.267	0.282429	1.2e-05	0.00169268	1.4e-05	0.0682077	0.00059	-9.32227	0.472899	1.18506	1.77503	-0.949016	magmatic zircon with rock-forming age
DS-05-20	135.52	0.282573	1.2e-05	0.0023449	3.6e-06	0.0901525	0.00021	-4.26735	0.471059	0.996104	1.45594	-0.929371	magmatic zircon with rock-forming age
DS-04-01	135.098	0.282437	1.4e-05	0.00138003	1.1e-05	0.0526917	0.00052	-9.0078	0.53812	1.16355	1.75517	-0.958433	magmatic zircon with rock-forming age
DS-04-02	135.657	0.282369	1.1e-05	0.00133338	6.5e-06	0.0529636	0.00033	-11.4044	0.442526	1.25845	1.90656	-0.959838	magmatic zircon with rock-forming age
DS-04-03	130.406	0.282474	1.4e-05	0.00154404	1.2e-05	0.0599826	0.00045	-7.7977	0.537694	1.11546	1.67527	-0.953493	magmatic zircon with rock-forming age
DS-04-05	131.749	0.282396	1.3e-05	0.00127461	9.5e-06	0.0496918	0.00039	-10.5265	0.506021	1.21842	1.84839	-0.961608	magmatic zircon with rock-forming age
DS-04-06	130.048	0.282422	1.3e-05	0.00213365	2e-05	0.0824417	0.00079	-9.70243	0.503679	1.20884	1.79493	-0.935733	magmatic zircon with rock-forming age
DS-04-07	132.926	0.282407	1.3e-05	0.00180836	1.5e-05	0.0698019	0.0006	-10.1418	0.504564	1.21953	1.82487	-0.945531	magmatic zircon with rock-forming age
DS-04-08	135.557	0.282407	1.3e-05	0.00160279	6e-06	0.0595622	0.00028	-10.0793	0.505132	1.21322	1.82297	-0.951723	magmatic zircon with rock-forming age
DS-04-10	135.728	0.282505	1.2e-05	0.00263346	6.3e-05	0.108297	0.0025	-6.69094	0.470245	1.10377	1.60916	-0.920679	magmatic zircon with rock-forming age
DS-04-12	135.426	0.282399	1.1e-05	0.000927636	3.5e-06	0.0329529	0.00014	-10.2905	0.443823	1.20223	1.83639	-0.972059	magmatic zircon with rock-forming age
DS-04-13	135.767	0.282419	1.4e-05	0.00187699	2.5e-05	0.0732553	0.0011	-9.66801	0.536842	1.20474	1.79713	-0.943464	magmatic zircon with rock-forming age
DS-04-14	136.514	0.282475	1.3e-05	0.00102243	4.5e-06	0.0394676	0.00013	-7.61563	0.506759	1.09978	1.66851	-0.969204	magmatic zircon with rock-forming age
DS-04-15	135.12	0.282378	1.3e-05	0.00110003	7.5e-06	0.0405287	0.00031	-11.0765	0.506508	1.23804	1.8856	-0.966867	magmatic zircon with rock-forming age
DS-04-16	136.299	0.282441	1.3e-05	0.00151934	2.6e-05	0.0601053	0.0011	-8.86772	0.505379	1.16278	1.7472	-0.954237	magmatic zircon with rock-forming age
DS-04-18	135.459	0.282348	1.3e-05	0.00187009	5.1e-05	0.0973428	0.0034	-12.1889	0.504404	1.30635	1.95557	-0.943672	magmatic zircon with rock-forming age
DS-01-02	136.405	0.282398	1.2e-05	0.00128974	8.9e-06	0.0477665	0.0003	-10.3341	0.474073	1.2151	1.83975	-0.961152	magmatic zircon with rock-forming age
DS-01-05	135.252	0.282407	1.2e-05	0.00129507	2.4e-05	0.0506597	0.001	-10.0441	0.474061	1.20271	1.82062	-0.960992	magmatic zircon with rock-forming age
DS-01-06	136.896	0.282436	1.2e-05	0.00180214	1.2e-05	0.0686663	0.00041	-9.06123	0.472586	1.17897	1.75977	-0.945719	magmatic zircon with rock-forming age
DS-01-07	134.492	0.282373	1.3e-05	0.00144254	2.1e-05	0.0521105	0.00077	-11.2936	0.505561	1.25632	1.89868	-0.95655	magmatic zircon with rock-forming age
DS-01-08	135.001	0.282398	1.2e-05	0.000955398	1e-05	0.0343019	0.00029	-10.3374	0.475059	1.20451	1.83902	-0.971223	magmatic zircon with rock-forming age
DS-01-09	135.144	0.282399	1.2e-05	0.000947903	4.6e-06	0.034613	0.00018	-10.316	0.475081	1.20357	1.83778	-0.971449	magmatic zircon with rock-forming age
DS-01-10	135.732	0.282416	1.4e-05	0.0016846	4.2e-05	0.0655531	0.0017	-9.77882	0.537342	1.20363	1.80415	-0.949259	magmatic zircon with rock-forming age
DS-01-11	135.353	0.282431	1.2e-05	0.001272	5.1e-06	0.0479062	0.00023	-9.19794	0.474133	1.16839	1.76738	-0.961687	magmatic zircon with rock-forming age
DS-01-14	136.581	0.282393	1.3e-05	0.00156796	1.7e-05	0.0605102	0.00065	-10.5607	0.505228	1.23241	1.85406	-0.952772	magmatic zircon with rock-forming age
DS-01-17	135.105	0.282415	1.2e-05	0.00136825	1.6e-05	0.0516247	0.0006	-9.78485	0.473845	1.19431	1.80415	-0.958788	magmatic zircon with rock-forming age
DS-01-18	135.547	0.282426	1.3e-05	0.00120006	8.8e-06	0.0462662	0.00038	-9.35719	0.506248	1.17291	1.77759	-0.963853	magmatic zircon with rock-forming age
DS-01-20	135.443	0.282251	1.2e-05	0.00125761	8.5e-06	0.0477912	0.00033	-15.5834	0.474113	1.42215	2.16903	-0.96212	magmatic zircon with rock-forming age
DS-05-02	144.736	0.282382	1.3e-05	0.00133998	1.7e-05	0.0531497	0.00062	-10.7503	0.505876	1.24017	1.87219	-0.959639	Type 2 older zircon
DS-05-05	141.83	0.282334	1.4e-05	0.000911939	1.4e-06	0.0362284	3.4e-05	-12.4588	0.539328	1.29274	1.97767	-0.972532	Type 2 older zircon
DS-05-15	149.157	0.282334	1.2e-05	0.00127539	1e-05	0.0509901	0.00044	-12.3558	0.474131	1.30595	1.97654	-0.961585	Type 2 older zircon
DS-01-01	170.644	0.28235	1.5e-05	0.000310915	2.6e-06	0.0109839	8.9e-05	-11.2094	0.573572	1.25061	1.92085	-0.990635	Type 2 older zircon
DS-01-03	148.393	0.282422	1.4e-05	0.00110788	9.6e-06	0.0417176	0.00038	-9.21769	0.538862	1.17567	1.77847	-0.96663	Type 2 older zircon
DS-01-04	147.621	0.282399	1.5e-05	0.00134751	9.6e-06	0.0545054	0.00034	-10.0888	0.570949	1.2164	1.8327	-0.959412	Type 2 older zircon
DS-01-16	146.854	0.282394	1.3e-05	0.00217979	2.2e-05	0.0857037	0.00096	-10.3485	0.503595	1.25068	1.84821	-0.934344	Type 2 older zircon
DS-01-19	151.767	0.282407	1.2e-05	0.00132641	4.9e-06	0.0504275	0.00024	-9.73046	0.474013	1.20499	1.81325	-0.960048	Type 2 older zircon
Data in blue color are for xenocrysts or inherited zircons. For the calculation of εHf(t) values, we have adopted the 176Lu decay constant of 1.867×10−11 (Soderlund et al., 2004), the present-day chondritic values of 176Lu/177Hf=0.0336 and 176Hf/177Hf=0.282785 (Bouvier et al., 2008). To calculate one-stage model ages (TDM1) relative to a depleted-mantle source, we have adopted the present-day dep…

## Sheet: PlotDat5
Source sheet	Supplementary Table S6	0.3	5.25253	1	5.15859	0.199069
Plot name	Average5	68.7	5.25253	2	5.31668	0.133103
Plot Type	15			3	5.23689	0.158953
1st free col	8			4	5.50021	0.193541
Sigma Level	2			5	5.06683	0.213646
Absolute Errs	TRUE			6	5.14164	0.24732
Symbol Type	1			7	5.32915	0.265376
Inverse Plot	FALSE			8	5.36005	0.173715
Color Plot	TRUE			9	5.57998	0.161407
3D plot	FALSE			10	5.25033	0.229753
Linear	FALSE			11	5.30868	0.115233
Data Range	F239:G306			12	4.99151	0.141647
Filled Symbols	FALSE			13	5.25033	0.165789
ConcAge	FALSE			14	5.17104	0.152198
ConcSwap	FALSE			15	5.23886	0.120853
1st Symbol-row	1			16	5.07279	0.174622
				17	5.19248	0.196611
				18	5.35207	0.164171
				19	5.33013	0.0948558
				20	5.16954	0.209652
				21	5.37251	0.178283
				22	5.24934	0.207374
				23	5.23388	0.16348
				24	5.19398	0.160001
				25	5.18251	0.169365
				26	5.57425	0.205699
				27	5.40918	0.247434
				28	5.13589	0.168255
				29	5.39073	0.163583
				30	5.35033	0.117644
				31	5.41167	0.172463
				32	5.21319	0.219611
				33	5.22067	0.167179
				34	5.53685	0.135954
				35	5.16681	0.16368
				36	5.32739	0.246736
				37	4.95686	0.176934
				38	5.27752	0.240072
				39	5.06657	0.192256
				40	5.04363	0.131149
				41	4.91846	0.249227
				42	5.29458	0.291225
				43	5.18188	0.257069
				44	5.07166	0.207578
				45	5.39582	0.136221
				46	5.30605	0.117386
				47	5.50554	0.117049
				48	5.38585	0.163034
				49	5.05571	0.199563
				50	5.46664	0.240693
				51	5.07217	0.192417
				52	5.26766	0.203106
				53	5.23026	0.229489
				54	4.7121	0.19547
				55	5.23075	0.223916
				56	5.1365	0.20071
				57	5.69405	0.164348
				58	5.05022	0.193043
				59	5.58234	0.208197
				60	5.54643	0.174275
				61	5.0971	0.142981
				62	5.42874	0.139288
				63	5.10957	0.169687
				64	5.70153	0.153996
				65	5.29509	0.249877
				66	4.89862	0.176535
				67	5.20033	0.229598
				68	4.83279	0.181684
				IsoLine	IsoLine	IsoLine	IsoLine

## Sheet: PlotDat6
Source sheet	Supplementary Table S6	0.3	5.55785	1	5.76825	0.20869
Plot name	Average6	33.7	5.55785	2	5.71389	0.205883
Plot Type	15			3	5.55181	0.16842
1st free col	8			4	5.87746	0.17605
Sigma Level	2			5	5.2845	0.218311
Absolute Errs	TRUE			6	5.60667	0.150333
Symbol Type	1			7	5.5169	0.159795
Inverse Plot	FALSE			8	5.59869	0.22278
Color Plot	TRUE			9	5.49695	0.167553
3D plot	FALSE			10	5.37228	0.235506
Linear	FALSE			11	5.45183	0.123191
Data Range	F308:G340			12	5.53911	0.177822
Filled Symbols	FALSE			13	5.73958	0.17353
ConcAge	FALSE			14	5.39047	0.222879
ConcSwap	FALSE			15	5.50068	0.204716
1st Symbol-row	1			16	5.66376	0.200308
				17	5.43685	0.179766
				18	5.4568	0.154301
				19	5.46527	0.133403
				20	5.16605	0.127075
				21	5.35955	0.147995
				22	5.48422	0.195518
				23	5.84117	0.254603
				24	5.71051	0.194493
				25	5.24621	0.199163
				26	5.93093	0.180488
				27	5.5594	0.233884
				28	5.53397	0.172892
				29	5.42675	0.187711
				30	5.76586	0.210091
				31	5.906	0.221542
				32	5.72198	0.31556
				33	5.52449	0.238767
				IsoLine	IsoLine	IsoLine	IsoLine

## Sheet: Supplementary Table S6
Supplementary Table S6. Zircon in-situ O isotopic compositions from the volcanic rocks in SE Zhejiang Province
Sample	Age (Ma)	IP(nA)	Intensity 16O	16O/18O Mean	δ18O	2σ
XX-01-01	93.2661	1.91567	1749135000	0.00202001	5.14348	0.306364
XX-01-02	94.5128	1.90323	1757573000	0.00202029	5.28013	0.211996
XX-01-03	94.2133	1.94485	1785204000	0.00202015	5.21031	0.148244
XX-01-05	93.7704	1.94031	1761852000	0.00201877	4.52559	0.257721
XX-01-06	95.577	1.93617	1772845000	0.00201982	5.04773	0.242356
XX-01-08	93.8245	1.92967	1696648000	0.0020206	5.43522	0.290161
XX-01-12	95.4686	1.92357	1756553000	0.00201795	4.11466	0.244064
XX-01-19	94.09	1.93429	1758582000	0.00201995	5.11206	0.210309
XX-01-20	95.4263	1.94532	1751506000	0.00201896	4.61785	0.192637
XX-01-04	143.732	1.94696	1784170000	0.00202146	5.86411	0.223609
XX-01-10	115.513	1.93593	1767461000	0.00201945	4.86171	0.235369
XX-01-15	126.241	1.88086	1699671000	0.00201312	1.70592	0.161995
XX-01-17	132.367	1.9224	1750080000	0.00202125	5.76237	0.222463
TS-01-01	108.9	2.55091	2420434000	0.00202005	5.17553	0.183667
TS-01-02	108.028	2.53761	2397233000	0.00201983	5.06631	0.276952
TS-01-03	109.341	2.52744	2399578000	0.00201965	4.97954	0.171659
TS-01-04	108.797	2.52971	2392082000	0.00201912	4.71423	0.169399
TS-01-05	109.051	2.53808	2396731000	0.00201946	4.88379	0.178947
TS-01-06	110.662	2.53878	2386917000	0.00202036	5.33262	0.204505
TS-01-08	108.88	2.53558	2414591000	0.00201956	4.93116	0.210532
TS-01-10	109.075	2.54606	2372485000	0.00201878	4.54367	0.177948
TS-01-11	109.346	2.52705	2373120000	0.00201938	4.8414	0.223314
TS-01-13	113.18	2.52541	2362535000	0.00201899	4.6484	0.161413
TS-01-15	108.103	2.5301	2355769000	0.00201959	4.94712	0.10924
TS-01-16	108.465	2.51782	2344581000	0.00201885	4.57808	0.16501
TS-01-17	108.991	2.49716	2338385000	0.00201929	4.8	0.100637
TS-01-18	109.193	2.51633	2341355000	0.0020191	4.70375	0.149808
TS-01-07	131.293	2.53487	2385167000	0.002021	5.65279	0.182794
TS-01-09	125.152	2.53479	2380897000	0.00201979	5.04786	0.112379
TS-01-12	129.473	2.5308	2377556000	0.00201931	4.80699	0.244819
TS-01-14	124.993	2.52228	2369861000	0.00201957	4.93565	0.135297
CC-01-02	111.185	2.25613	2182151000	0.00202137	5.66751	0.174378
CC-01-04	111.687	2.24174	2153808000	0.00202041	5.19025	0.191285
CC-01-11	109.703	2.22116	2094375000	0.00202011	5.03964	0.207484
CC-01-14	110.471	2.19629	2069487000	0.00201916	4.56388	0.142774
CC-01-15	110.069	2.18862	2067329000	0.00201906	4.51401	0.139718
CC-01-17	110.987	2.18666	2044715000	0.0020191	4.53396	0.120193
CC-01-20	112.619	2.17289	1972521000	0.00201913	5.0587	0.158958
CC-01-03	133.515	2.28218	2194009000	0.00202106	5.51241	0.209229
CC-01-12	137.76	2.19988	2049597000	0.00202088	5.42115	0.173004
CC-01-16	132.69	2.19957	2051260000	0.00201999	4.98079	0.217029
CC-01-18	156.309	2.19018	2023152000	0.00202198	5.97271	0.220782
GT-01-02	118.532	2.31895	2161411000	0.00201953	4.75089	0.146574
GT-01-03	120.306	2.32435	2149683000	0.00202047	5.21868	0.195606
GT-01-04	117.683	2.32286	2131579000	0.00201953	4.7474	0.202661
GT-01-05	116.894	2.29462	2101647000	0.00202107	6.02768	0.235115
GT-01-07	116.696	2.27178	2088344000	0.00201941	5.20083	0.148917
GT-01-08	114.951	2.2839	2089147000	0.00201842	4.70811	0.262068
GT-01-09	116.035	2.28633	2093704000	0.00201884	4.91357	0.186181
GT-01-11	117.54	2.29908	2109572000	0.00201874	4.86769	0.181549
GT-01-12	115.359	2.30737	2102145000	0.00201897	4.9819	0.188842
GT-01-13	115.506	2.30925	2090345000	0.00201848	4.73454	0.234728
GT-01-15	116.231	2.2965	2077541000	0.0020192	5.0971	0.198147
GT-01-16	115.829	2.3019	2068927000	0.00201866	4.8258	0.147928
GT-01-17	116.12	2.2958	2068573000	0.00201819	4.59391	0.284989
GT-01-18	115.04	2.30417	2052176000	0.0020181	4.54753	0.247306
GT-01-06	146.679	2.28985	2089218000	0.00202101	5.99925	0.221932
JLP-01-01	118.926	2.16288	2082776000	0.00202087	5.41866	0.175257
JLP-01-03	118.72	2.16765	2087893000	0.00202205	6.00363	0.167771
JLP-01-08	119.254	2.16476	2058442000	0.00202178	5.87248	0.242695
JLP-01-10	119.634	2.16922	2048094000	0.00201966	4.81672	0.252402
JLP-01-12	121.087	2.16366	2033527000	0.00201998	4.97281	0.227517
JLP-01-16	116.957	2.15279	2003797000	0.00201976	4.86609	0.150763
JLP-01-18	120.459	2.16022	2003883000	0.00201867	4.31901	0.207821
JLP-01-19	120.339	2.15944	1993964000	0.00201869	4.84276	0.222443
JLP-01-02	140.455	2.15733	2100068000	0.00201994	4.95586	0.269368
JLP-01-04	130.28	2.15232	2080944000	0.00201992	4.94588	0.241113
JLP-01-05	129.786	2.16945	2069055000	0.00201985	4.90898	0.196393
JLP-01-06	139.999	2.16053	2057137000	0.00202113	5.54782	0.184358
JLP-01-07	144.711	2.15459	2069691000	0.00202272	6.34225	0.153393
JLP-01-09	200.133	2.16484	2062823000	0.0020202	5.08552	0.164213
JLP-01-13	135.04	2.15647	2022174000	0.00201993	4.94688	0.146458
JLP-01-15	127.089	2.16836	2009073000	0.0020192	4.58532	0.11983
CW-01-01	115.729	2.30096	2166204000	0.00202065	5.30944	0.19753
CW-01-02	126.149	2.28993	2164258000	0.00202125	5.60816	0.256464
CW-01-03	127.404	2.26967	2158737000	0.00202243	6.19713	0.159466
CW-01-04	126.267	2.28257	2150625000	0.00202184	5.9009	0.174431
CW-01-05	124.854	2.29306	2149272000	0.00201872	4.34694	0.190944
CW-01-06	124.581	2.30581	2150555000	0.00201994	4.95187	0.169892
CW-01-08	122.519	2.29713	2119996000	0.00201996	5.47262	0.205852
CW-01-09	122.438	2.29118	2106169000	0.00202045	5.71798	0.202743
CW-01-10	125.77	2.28735	2112622000	0.00202076	5.87109	0.193562
CW-01-11	116.075	2.29603	2092730000	0.00201972	5.35243	0.106466
CW-01-13	125.491	2.27295	2072491000	0.0020195	5.24322	0.151914
CW-01-14	125.56	2.26787	2064649000	0.00201914	5.06668	0.237773
CW-01-15	125.756	2.27467	2067387000	0.00201944	5.21379	0.207349
CW-01-16	125.436	2.27491	2064035000	0.0020194	5.19584	0.174584
CW-01-17	153.429	2.26896	2054849000	0.00201914	5.06418	0.119622
CW-01-18	125.168	2.26513	1996755000	0.00202227	6.62612	0.21536
CW-01-19	125.266	2.2487	2006407000	0.00201872	4.85573	0.164334
XST-03-04	130.309	2.29486	2191449000	0.00202114	5.5543	0.176164
XST-03-06	129.455	2.34477	2219720000	0.0020208	5.38424	0.243254
XST-03-07	129.494	2.36456	2166002000	0.00202259	6.27343	0.199474
XST-03-08	127.735	2.31786	2160959000	0.00202057	5.26655	0.137574
XST-03-13	130.499	2.24017	2033419000	0.00202152	6.25209	0.198399
XST-03-14	130.386	2.23939	2018199000	0.00202004	5.51302	0.205662
XST-02-01	130.128	2.54997	2378837000	0.00202175	6.02332	0.131378
XST-02-02	131.208	2.54833	2383258000	0.00202167	5.98642	0.136139
XST-02-04	130.947	2.5585	2372329000	0.00202169	5.9949	0.175776
XST-02-05	131.11	2.55764	2376562000	0.00202159	5.94403	0.19878
XST-02-06	131.098	2.57093	2394709000	0.00202086	5.58247	0.138638
XST-02-07	131.004	2.5725	2388282000	0.00202138	5.8403	0.163358
XST-02-08	132.134	2.58071	2395528000	0.00202176	6.02981	0.177822
XST-02-09	130.803	2.57641	2376663000	0.00202152	5.91161	0.207242
XST-02-10	130.657	2.57015	2375091000	0.00202134	5.82085	0.181618
XST-02-11	131.341	2.56061	2360078000	0.00202133	5.81786	0.103519
XST-02-12	131.771	2.55333	2355488000	0.00202075	5.52462	0.146787
XST-02-13	131.285	2.55873	2368166000	0.00202264	6.47166	0.144601
XST-02-14	130.635	2.56256	2362198000	0.00202178	6.03878	0.207149
XST-02-15	130.747	2.56507	2372389000	0.00202099	5.64481	0.201797
XST-02-17	130.871	2.57649	2383358000	0.00202104	5.67323	0.193478
XST-02-18	130.612	2.59253	2366561000	0.00202091	5.60441	0.180928
XST-02-19	130.801	2.57109	2366273000	0.00202107	5.6852	0.120711
XST-02-20	129.9	2.57156	2355145000	0.00202053	5.4164	0.204849
XST-02-03	152.382	2.54966	2387835000	0.0020212	5.75153	0.191095
XST-01-01	131.546	2.552	2396364000	0.00202154	5.92059	0.184077
XST-01-02	130.442	2.54872	2395270000	0.00202187	6.08367	0.15174
XST-01-03	131.921	2.54559	2408206000	0.00202191	6.10262	0.131676
XST-01-04	130.098	2.55607	2412571000	0.00202114	5.72111	0.178861
XST-01-05	131.564	2.5646	2421368000	0.00202197	6.13403	0.173019
XST-01-06	133.912	2.61975	2404717000	0.00202359	6.94443	0.257338
XST-01-07	130.99	2.58267	2415680000	0.0020215	5.90064	0.248694
XST-01-08	130.724	2.59495	2417398000	0.00202192	6.1086	0.228141
XST-01-09	131.713	2.58736	2426085000	0.00202213	6.21682	0.171491
XST-01-10	130.632	2.59167	2418413000	0.00202156	5.93156	0.181496
XST-01-11	129.719	2.55091	2382610000	0.00202145	5.87471	0.146114
XST-01-14	130.225	2.51813	2329242000	0.00202166	5.98243	0.191966
XST-01-15	128.821	2.49904	2348446000	0.00202208	6.18889	0.156365
XST-01-16	134.544	2.52001	2353217000	0.00202149	5.89715	0.239887
XST-01-17	131.326	2.52846	2361743000	0.00202155	5.92657	0.199035
XST-01-18	129.835	2.54199	2384461000	0.00202065	5.47724	0.170855
XST-01-19	129.982	2.54942	2366232000	0.00202141	5.85576	0.165206
XST-01-13	154.795	2.54074	2364060000	0.00202222	6.25921	0.164861
GW-03-01	130.24	2.16538	2048829000	0.00202175	5.80092	0.230287
GW-03-02	131.392	2.18142	2033576000	0.00202163	5.74008	0.183237
GW-03-03	131.263	2.16241	2032048000	0.00202234	6.09416	0.219199
GW-03-04	132.756	2.1549	2028916000	0.00202262	6.23729	0.239681
GW-03-06	130.893	2.1671	2050009000	0.00202209	5.96949	0.149261
GW-03-08	131.512	2.18471	2052500000	0.00202265	6.25125	0.159589
GW-03-09	132.402	2.19175	2052318000	0.00202159	5.72013	0.206454
GW-03-11	133.313	2.17493	2039671000	0.00202108	5.46729	0.142201
GW-03-13	132.228	2.17681	2023463000	0.00202105	5.45333	0.206549
GW-03-14	133.016	2.1664	2010118000	0.00202163	5.74008	0.187697
GW-03-16	134.81	2.15866	2022351000	0.00202125	5.54958	0.170151
GW-03-17	130.239	2.17188	2020798000	0.00202326	6.55397	0.188654
GW-03-19	133.369	2.17172	2020784000	0.00202156	5.70567	0.158549
GW-03-20	133.453	2.17313	2027175000	0.00202028	5.06584	0.225817
GW-03-05	142.861	2.16992	2044944000	0.00202209	5.96999	0.168804
GW-03-07	146.687	2.17681	2044844000	0.00202286	6.35349	0.216471
GW-03-10	141.314	2.19277	2052470000	0.00202142	5.63486	0.142318
GW-03-12	141.229	2.18713	2024608000	0.00202188	5.86775	0.322276
GW-03-15	143.964	2.14669	2000600000	0.00202171	5.78297	0.146861
GW-03-18	144.509	2.17055	2023043000	0.00202125	5.55207	0.15027
GW-02-01	133.031	2.5017	2368939000	0.00202158	5.94154	0.191014
GW-02-02	132.77	2.49349	2370943000	0.00202118	5.74156	0.217679
GW-02-05	132.908	2.5042	2380041000	0.00202092	5.61139	0.201574
GW-02-06	131.993	2.51383	2379994000	0.00202085	5.57898	0.106749
GW-02-07	132.078	2.50483	2352636000	0.00202062	5.46178	0.16982
GW-02-08	132.604	2.49294	2352349000	0.00202119	5.74455	0.145721
GW-02-11	132.111	2.4895	2346914000	0.00202085	5.57648	0.167321
GW-02-13	131.908	2.52345	2367526000	0.00202058	5.44134	0.120753
GW-02-14	133.361	2.50139	2351358000	0.00202001	5.15608	0.164464
GW-02-18	131.561	2.47002	2296309000	0.00202105	5.67672	0.225551
GW-02-04	138.558	2.49662	2365394000	0.00202241	6.35596	0.156587
GW-04-01	132.658	2.03967	1853823000	0.00202198	6.12343	0.228733
GW-04-02	132.72	2.02136	1807674000	0.00202205	6.15884	0.258644
GW-04-05	133.575	2.01518	1841640000	0.00202157	5.92246	0.229774
GW-04-06	132.66	2.01236	1831206000	0.00202318	6.72487	0.206384
GW-04-07	132.347	2.00853	1830573000	0.00202199	6.13191	0.26463
GW-04-08	133.623	2.00837	1816260000	0.00202152	5.89353	0.204876
GW-04-10	133.787	2.00783	1771221000	0.00202273	6.49995	0.134333
GW-04-11	131.852	2.00407	1806713000	0.00202172	5.99477	0.167197
GW-04-12	132.71	1.9928	1795135000	0.00202232	6.29698	0.209543
GW-04-13	132.738	1.98694	1799889000	0.00202221	6.23913	0.183458
GW-04-14	132.273	1.9806	1790606000	0.00202147	5.86959	0.218008
GW-04-15	132.707	1.98303	1793459000	0.00202317	6.72138	0.210936
GW-04-17	132.605	1.98091	1793442000	0.00202185	6.06209	0.216235
GW-04-19	131.921	1.9418	1748515000	0.0020219	6.08753	0.149705
DS-05-01	135.432	1.96175	1783519000	0.00202282	6.54584	0.183827
DS-05-03	135.019	1.97927	1812434000	0.00202185	6.0606	0.2086
DS-05-04	133.613	1.99437	1825378000	0.00202276	6.51541	0.244237
DS-05-06	134.065	2.01502	1840613000	0.00202273	6.50095	0.179816
DS-05-08	135.386	2.03161	1839228000	0.00202232	6.29299	0.2092
DS-05-09	135.498	2.03036	1850929000	0.00202256	6.41667	0.19925
DS-05-10	134.092	2.04413	1852524000	0.00202451	7.38715	0.182768
DS-05-11	136.573	2.04663	1848992000	0.0020224	6.33239	0.174422
DS-05-13	135.232	2.04757	1833400000	0.00202199	6.13191	0.211165
DS-05-14	135.169	2.03247	1837495000	0.00202224	6.25609	0.237572
DS-05-16	135.535	2.03083	1812844000	0.0020223	6.28651	0.19025
DS-05-17	135.267	2.01776	1825538000	0.00202213	6.20273	0.18642
DS-05-02	144.736	1.95721	1780802000	0.00202416	7.2116	0.271142
DS-05-05	141.83	2.00125	1826113000	0.00202455	7.4056	0.141205
DS-05-15	149.157	2.03208	1831845000	0.0020243	7.28142	0.248431
DS-04-01	135.098	2.11007	1879873000	0.00202314	6.70592	0.185195
DS-04-02	135.657	2.08035	1840466000	0.00202318	6.72337	0.244775
DS-04-03	130.406	2.04741	1823323000	0.00202283	6.55082	0.220539
DS-04-05	131.749	2.03466	1828926000	0.00202325	6.76028	0.209286
DS-04-06	130.048	2.03411	1832861000	0.00202159	5.93143	0.206762
DS-04-07	132.926	2.03818	1820065000	0.00202173	6.00025	0.219969
DS-04-08	135.557	2.01948	1810463000	0.00202157	5.92246	0.266976
DS-04-10	135.728	2.00564	1789269000	0.0020233	6.78172	0.137501
DS-04-12	135.426	1.95784	1751214000	0.00202075	5.50953	0.204263
DS-04-13	135.767	1.96511	1766434000	0.0020234	6.83209	0.173591
DS-04-14	136.514	1.97356	1751848000	0.00202169	5.9823	0.145113
DS-04-15	135.12	1.95228	1753589000	0.00202262	6.4426	0.238643
DS-04-16	136.299	1.95306	1747287000	0.00202278	6.52589	0.257657
DS-04-18	135.459	1.95948	1757302000	0.0020232	6.73135	0.198494
DS-01-02	136.405	2.01776	1857572000	0.0020244	7.33279	0.254499
DS-01-05	135.252	2.06368	1866824000	0.00202399	7.12682	0.210594
DS-01-06	136.896	2.03067	1860287000	0.00202437	7.31484	0.200827
DS-01-07	134.492	2.03646	1851427000	0.00202408	7.17171	0.165128
DS-01-08	135.001	2.02848	1853364000	0.00202416	7.2136	0.18409
DS-01-09	135.144	2.03442	1857403000	0.00202466	7.46245	0.23048
DS-01-10	135.732	2.02989	1845462000	0.00202411	7.18916	0.283047
DS-01-11	135.353	2.02496	1839071000	0.00202387	7.06997	0.205067
DS-01-14	136.581	2.11884	1934370000	0.00202252	6.39573	0.172472
DS-01-17	135.105	2.04272	1843873000	0.00202398	7.12483	0.240256
DS-01-01	170.644	2.01768	1836504000	0.0020243	7.28292	0.123238
DS-01-03	148.393	2.03169	1867644000	0.00202419	7.22906	0.203278
DS-01-04	147.621	2.04123	1864384000	0.0020246	7.43153	0.27309
DS-01-16	146.854	2.06407	1852766000	0.00202349	6.87997	0.297822
Penglai@1		2.21506	2088760000	0.00202046	5.15859	0.199069
Penglai@2		2.21373	2085784000	0.00202078	5.31668	0.133103
Penglai@3		2.22398	2068899000	0.00202062	5.23689	0.158953
Penglai@4		2.17274	2037473000	0.00202115	5.50021	0.193541
Penglai@5		2.18079	2046474000	0.00202028	5.06683	0.213646
Penglai@6		2.16124	2036451000	0.00202043	5.14164	0.24732
Penglai@7		2.16906	2041476000	0.0020208	5.32915	0.265376
Penglai@01		2.5484	2396994000	0.00202042	5.36005	0.173715
Penglai@02		2.56061	2382417000	0.00202086	5.57998	0.161407
Penglai@03		2.5531	2387121000	0.0020202	5.25033	0.229753
Penglai@04		2.5628	2384889000	0.00202031	5.30868	0.115233
Penglai@05		2.56968	2396764000	0.00201968	4.99151	0.141647
Penglai@06		2.57313	2397590000	0.0020202	5.25033	0.165789
Penglai@07		2.55365	2366282000	0.00202004	5.17104	0.152198
Penglai@08		2.56178	2416616000	0.00202017	5.23886	0.120853
Penglai@09		2.57845	2390562000	0.00201984	5.07279	0.174622
Penglai@10		2.51789	2340948000	0.00202008	5.19248	0.196611
Penglai@11		2.56131	2414519000	0.0020204	5.35207	0.164171
Penglai@12		2.52994	2397237000	0.00202036	5.33013	0.0948558
Penglai@13		2.5258	2396298000	0.00202003	5.16954	0.209652
Penglai@14		2.51375	2368863000	0.00202044	5.37251	0.178283
Penglai@15		2.50725	2362464000	0.00202019	5.24934	0.207374
Penglai@16		2.4891	2357459000	0.00202016	5.23388	0.16348
Penglai@17		2.5229	2372274000	0.00202008	5.19398	0.160001
Penglai@18		2.4762	2336653000	0.00202006	5.18251	0.169365
Penglai@14		2.29001	2152321000	0.00202118	5.57425	0.205699
Penglai@15		2.2203	2107343000	0.00202085	5.40918	0.247434
Penglai@16		2.20943	2099170000	0.00202031	5.13589	0.168255
Penglai@01		2.29337	2167769000	0.00202082	5.39073	0.163583
Penglai@2		2.30456	2171934000	0.00202074	5.35033	0.117644
Penglai@17		2.1779	2073010000	0.00202086	5.41167	0.172463
Penglai@3		2.30354	2157443000	0.00202046	5.21319	0.219611
Penglai@@04		2.29454	2155235000	0.00202047	5.22067	0.167179
Penglai@18		2.16656	2037993000	0.00202111	5.53685	0.135954
Penglai@05		2.27702	2136171000	0.00202037	5.16681	0.16368
Penglai@19		2.16155	2041661000	0.00202069	5.32739	0.246736
Penglai@06		2.29963	2152799000	0.00201995	4.95686	0.176934
Penglai@20		2.156	2028866000	0.00202059	5.27752	0.240072
Penglai@07		2.28586	2152826000	0.00202017	5.06657	0.192256
Penglai@08		2.28735	2128663000	0.00202012	5.04363	0.131149
Penglai@21		2.15787	1996694000	0.00201987	4.91846	0.249227
Penglai@09		2.26849	2094014000	0.0020196	5.29458	0.291225
Penglai@10		2.26309	2072535000	0.00201937	5.18188	0.257069
Penglai@11		2.24393	2063788000	0.00201915	5.07166	0.207578
Penglai@12		2.33835	2098048000	0.0020198	5.39582	0.136221
Penglai@13		2.24995	2055465000	0.00201962	5.30605	0.117386
Penglai@01		2.14606	1958018000	0.00202074	5.50554	0.117049
Penglai@04		2.03818	1840315000	0.0020205	5.38585	0.163034
Penglai@05		1.99335	1793986000	0.00201984	5.05571	0.199563
Penglai@06		1.9497	1756559000	0.00202066	5.46664	0.240693
Penglai@07		1.95964	1777196000	0.00201987	5.07217	0.192417
Penglai@08		2.03388	1831566000	0.00202026	5.26766	0.203106
Penglai@09		2.03177	1842723000	0.00202018	5.23026	0.229489
Penglai@10		2.04389	1844584000	0.00201915	4.7121	0.19547
Penglai@11		2.04076	1826612000	0.00202019	5.23075	0.223916
Penglai@12		2.11758	1861167000	0.00202	5.1365	0.20071
Penglai@13		2.03043	1858486000	0.00202111	5.69405	0.164348
Penglai@14		2.00431	1841870000	0.00201982	5.05022	0.193043
Penglai@15		1.98138	1823033000	0.00202089	5.58234	0.208197
Penglai@16		1.9788	1801341000	0.00202082	5.54643	0.174275
Penglai@17		1.92521	1773873000	0.00201992	5.0971	0.142981
Penglai@18		1.93726	1759222000	0.00202058	5.42874	0.139288
Penglai@19		1.92177	1748436000	0.00201994	5.10957	0.169687
Penglai@2		2.18009	1966438000	0.00202113	5.70153	0.153996
Penglai@20		1.89987	1736056000	0.00202031	5.29509	0.249877
Penglai@21		1.92999	1741145000	0.00201952	4.89862	0.176535
Penglai@3		2.16523	1951439000	0.00202012	5.20033	0.229598
Penglai@9		2.04569	1851228000	0.00201939	4.83279	0.181684
Qinghu@02		2.27866	2185928000	0.00202157	5.76825	0.20869
Qinghu@01		2.29752	2190205000	0.00202146	5.71389	0.205883
Qinghu@03		2.3098	2196899000	0.00202114	5.55181	0.16842
Qinghu@04		2.28007	2148074000	0.00202179	5.87746	0.17605
Qinghu@05		2.26536	2160226000	0.0020206	5.2845	0.218311
Qinghu@07		2.20082	2085562000	0.00202125	5.60667	0.150333
Qinghu@06		2.26748	2145340000	0.00202107	5.5169	0.159795
Qinghu@08		2.18181	2077381000	0.00202123	5.59869	0.22278
Qinghu@09		2.15107	2056196000	0.00202103	5.49695	0.167553
Qinghu@10		2.14739	2040050000	0.00202078	5.37228	0.235506
Qinghu@1		2.21443	2052849000	0.00202105	5.45183	0.123191
Qinghu@2		2.16311	2056395000	0.00202122	5.53911	0.177822
Qinghu@3		2.16726	2059897000	0.00202163	5.73958	0.17353
Qinghu@01		2.56444	2386117000	0.00202048	5.39047	0.222879
Qinghu@02		2.56608	2407017000	0.0020207	5.50068	0.204716
Qinghu@03		2.54621	2404596000	0.00202103	5.66376	0.200308
Qinghu@04		2.56788	2407542000	0.00202057	5.43685	0.179766
Qinghu@05		2.54348	2399897000	0.00202061	5.4568	0.154301
Qinghu@06		2.52893	2392977000	0.00202063	5.46527	0.133403
Qinghu@07		2.50507	2359425000	0.00202003	5.16605	0.127075
Qinghu@08		2.50741	2366360000	0.00202041	5.35955	0.147995
Qinghu@09		2.49544	2354541000	0.00202067	5.48422	0.195518
Qinghu@01		2.138	1923520000	0.00202141	5.84117	0.254603
Qinghu@02		1.97818	1784249000	0.00202115	5.71051	0.194493
Qinghu@03		1.96785	1800801000	0.00202022	5.24621	0.199163
Qinghu@04		2.04827	1871999000	0.00202159	5.93093	0.180488
Qinghu@05		2.04561	1899861000	0.00202084	5.5594	0.233884
Qinghu@06		2.06892	1886562000	0.00202079	5.53397	0.172892
Qinghu@07		1.99727	1831056000	0.00202058	5.42675	0.187711
Qinghu@08		1.96871	1785124000	0.00202126	5.76586	0.210091
Qinghu@09		1.92787	1776468000	0.00202154	5.906	0.221542
Qinghu@10		1.91473	1750813000	0.00202117	5.72198	0.31556
Qinghu@11		1.92584	1745530000	0.00202077	5.52449	0.238767
Data in blue color are for older zircons.
